# Supplementary material
Source: MDPI journal article supplement (https://www.mdpi.com/2073-4352/13/8/1218)
Supplement: s1 [file s1]

Archive with 4 entries (4 files):
- checkcif_hanauerite_Friedrichssegen_Mine_Supplement 4.pdf
- checkcif_hanauerite_Schone_Aussicht_Supplement 3.pdf
- hanauerite_Friedrichssegen_Mine_Supplement 2.CIF
- hanauerite_Schone_Aussicht_Supplement 1.CIF
