# Supplementary material
Source: MDPI journal article supplement (https://www.mdpi.com/2073-4352/13/8/1218)
Supplement: s1 [file s1 › hanauerite_Friedrichssegen_Mine_Supplement 2.CIF]

 
data_hanauerite_Friedrichssegen_Mine 
 
_audit_creation_method            SHELXL-97 
_chemical_name_systematic 
; 
 ? 
; 
_chemical_name_common             ? 
_chemical_melting_point           ? 
_chemical_formula_moiety          ? 
_chemical_formula_sum 
 'Ag Br0.25 Hg I0.75 S' 
_chemical_formula_weight          455.67 
 
loop_ 
 _atom_type_symbol 
 _atom_type_description 
 _atom_type_scat_dispersion_real 
 _atom_type_scat_dispersion_imag 
 _atom_type_scat_source 
 'S'  'S'   0.1246   0.1234 
 'International Tables Vol C Tables 4.2.6.8 and 6.1.1.4' 
 'Ag'  'Ag'  -0.8971   1.1015 
 'International Tables Vol C Tables 4.2.6.8 and 6.1.1.4' 
 'I'  'I'  -0.4742   1.8119 
 'International Tables Vol C Tables 4.2.6.8 and 6.1.1.4' 
 'Hg'  'Hg'  -2.3894   9.2266 
 'International Tables Vol C Tables 4.2.6.8 and 6.1.1.4' 
 'Br'  'Br'  -0.2901   2.4595 
 'International Tables Vol C Tables 4.2.6.8 and 6.1.1.4' 
 
_symmetry_cell_setting            'orthorhombic' 
_symmetry_space_group_name_H-M    'P m m a' 
 
loop_ 
 _symmetry_equiv_pos_as_xyz 
 'x, y, z' 
 '-x+1/2, -y, z' 
 '-x, y, -z' 
 'x+1/2, -y, -z' 
 '-x, -y, -z' 
 'x-1/2, y, -z' 
 'x, -y, z' 
 '-x-1/2, y, z' 
 
_cell_length_a                    9.9276(8) 
_cell_length_b                    4.6209(2) 
_cell_length_c                    9.9006(4) 
_cell_angle_alpha                 90.00 
_cell_angle_beta                  90.00 
_cell_angle_gamma                 90.00 
_cell_volume                      454.19(5) 
_cell_formula_units_Z             4 
_cell_measurement_temperature     293(2) 
_cell_measurement_reflns_used     1983 
_cell_measurement_theta_min       2.9090 
_cell_measurement_theta_max       28.8600 
 
_exptl_crystal_description        'prismatic' 
_exptl_crystal_colour             'black' 
_exptl_crystal_size_max           0.0454 
_exptl_crystal_size_mid           0.0197 
_exptl_crystal_size_min           0.0164 
_exptl_crystal_density_meas       ? 
_exptl_crystal_density_diffrn     6.664 
_exptl_crystal_density_method     'not measured' 
_exptl_crystal_F_000              766 
_exptl_absorpt_coefficient_mu     45.610 
_exptl_absorpt_correction_type    'gaussian' 
_exptl_absorpt_correction_T_min   0.274 
_exptl_absorpt_correction_T_max   0.521
_exptl_absorpt_process_details    ? 
 
_exptl_special_details 
; 
 ? 
; 
 
_diffrn_ambient_temperature       293(2) 
_diffrn_radiation_wavelength      0.71073 
_diffrn_radiation_type            MoK\a 
_diffrn_radiation_source          'fine-focus sealed tube' 
_diffrn_radiation_monochromator   graphite 
_diffrn_measurement_device_type   'Xcalibur, Sapphire3' 
_diffrn_measurement_method        '\w scans' 
_diffrn_detector_area_resol_mean  16.0630 
_diffrn_standards_number          ? 
_diffrn_standards_interval_count  ? 
_diffrn_standards_interval_time   ? 
_diffrn_standards_decay_%         ? 
_diffrn_reflns_number             7457 
_diffrn_reflns_av_R_equivalents   0.0654 
_diffrn_reflns_av_sigmaI/netI     0.0274 
_diffrn_reflns_limit_h_min        -13 
_diffrn_reflns_limit_h_max        13 
_diffrn_reflns_limit_k_min        -6 
_diffrn_reflns_limit_k_max        6 
_diffrn_reflns_limit_l_min        -13 
_diffrn_reflns_limit_l_max        13 
_diffrn_reflns_theta_min          2.91 
_diffrn_reflns_theta_max          28.28 
_reflns_number_total              667 
_reflns_number_gt                 635 
_reflns_threshold_expression      >2sigma(I) 
 
_computing_data_collection        ? 
_computing_cell_refinement        ? 
_computing_data_reduction         ? 
_computing_structure_solution     'SHELXS-97 (Sheldrick, 1990)' 
_computing_structure_refinement   'SHELXL-97 (Sheldrick, 1997)' 
_computing_molecular_graphics     ? 
_computing_publication_material   ? 
 
_refine_special_details 
; 
 Refinement of F^2^ against ALL reflections.  The weighted R-factor wR and 
 goodness of fit S are based on F^2^, conventional R-factors R are based 
 on F, with F set to zero for negative F^2^. The threshold expression of 
 F^2^ > 2sigma(F^2^) is used only for calculating R-factors(gt) etc. and is 
 not relevant to the choice of reflections for refinement.  R-factors based 
 on F^2^ are statistically about twice as large as those based on F, and R- 
 factors based on ALL data will be even larger. 
; 
 
_refine_ls_structure_factor_coef  Fsqd  
_refine_ls_matrix_type            full 
_refine_ls_weighting_scheme       calc  
_refine_ls_weighting_details 
 'calc w=1/[\s^2^(Fo^2^)+(0.0256P)^2^+7.7898P] where P=(Fo^2^+2Fc^2^)/3' 
_atom_sites_solution_primary      direct 
_atom_sites_solution_secondary    difmap 
_atom_sites_solution_hydrogens    none 
_refine_ls_hydrogen_treatment     none 
_refine_ls_extinction_method      none 
_refine_ls_extinction_coef        ? 
_refine_ls_number_reflns          667 
_refine_ls_number_parameters      37 
_refine_ls_number_restraints      0 
_refine_ls_R_factor_all           0.0586 
_refine_ls_R_factor_gt            0.0544 
_refine_ls_wR_factor_ref          0.0995 
_refine_ls_wR_factor_gt           0.0984 
_refine_ls_goodness_of_fit_ref    1.447 
_refine_ls_restrained_S_all       1.447 
_refine_ls_shift/su_max           0.000 
_refine_ls_shift/su_mean          0.000 
 
loop_ 
 _atom_site_label 
 _atom_site_type_symbol 
 _atom_site_fract_x 
 _atom_site_fract_y 
 _atom_site_fract_z 
 _atom_site_U_iso_or_equiv 
 _atom_site_adp_type 
 _atom_site_occupancy 
 _atom_site_symmetry_multiplicity 
 _atom_site_calc_flag 
 _atom_site_refinement_flags 
 _atom_site_disorder_assembly 
 _atom_site_disorder_group 
Hg1 Hg 0.2500 0.5000 0.75709(13) 0.0392(3) Uani 1 4 d S . . 
Hg2 Hg 0.0000 0.5000 0.5000 0.0402(4) Uani 1 4 d S . . 
Ag Ag 0.0914(17) 0.0000 0.2230(14) 0.059(3) Uani 0.50 2 d SP . . 
Ag' Ag 0.0521(17) 0.0000 0.1885(16) 0.088(5) Uani 0.50 2 d SP . . 
Br1 Br 0.2500 0.0000 0.4769(2) 0.0303(7) Uani 0.46(2) 4 d SP . . 
I1 I 0.2500 0.0000 0.4769(2) 0.0303(7) Uani 0.54(2) 4 d SP . . 
Br2 Br 0.2500 0.0000 0.98976(17) 0.0336(6) Uani 0.03(3) 4 d SP . . 
I2 I 0.2500 0.0000 0.98976(17) 0.0336(6) Uani 0.97(3) 4 d SP . . 
S S 0.4876(5) 0.5000 0.7387(5) 0.0297(10) Uani 1 2 d S . . 
 
loop_ 
 _atom_site_aniso_label 
 _atom_site_aniso_U_11 
 _atom_site_aniso_U_22 
 _atom_site_aniso_U_33 
 _atom_site_aniso_U_23 
 _atom_site_aniso_U_13 
 _atom_site_aniso_U_12 
Hg1 0.0315(6) 0.0406(7) 0.0453(7) 0.000 0.000 0.000 
Hg2 0.0493(7) 0.0406(7) 0.0308(6) 0.000 -0.0065(5) 0.000 
Ag 0.077(7) 0.038(3) 0.063(4) 0.000 0.025(4) 0.000 
Ag' 0.093(11) 0.029(3) 0.142(13) 0.000 0.063(8) 0.000 
Br1 0.0312(12) 0.0227(11) 0.0371(13) 0.000 0.000 0.000 
I1 0.0312(12) 0.0227(11) 0.0371(13) 0.000 0.000 0.000 
Br2 0.0428(12) 0.0352(10) 0.0228(9) 0.000 0.000 0.000 
I2 0.0428(12) 0.0352(10) 0.0228(9) 0.000 0.000 0.000 
S 0.032(2) 0.024(2) 0.032(2) 0.000 -0.002(2) 0.000 
 
_geom_special_details 
; 
 All esds (except the esd in the dihedral angle between two l.s. planes) 
 are estimated using the full covariance matrix.  The cell esds are taken 
 into account individually in the estimation of esds in distances, angles 
 and torsion angles; correlations between esds in cell parameters are only 
 used when they are defined by crystal symmetry.  An approximate (isotropic) 
 treatment of cell esds is used for estimating esds involving l.s. planes. 
; 
 
loop_ 
 _geom_bond_atom_site_label_1 
 _geom_bond_atom_site_label_2 
 _geom_bond_distance 
 _geom_bond_site_symmetry_2 
 _geom_bond_publ_flag 
Hg1 S 2.366(5) . ? 
Hg1 S 2.366(5) 2_565 ? 
Hg1 I2 3.2626(14) 1_565 ? 
Hg1 Br2 3.2626(14) 1_565 ? 
Hg1 Br2 3.2626(14) . ? 
Hg1 Hg2 3.5551(9) . ? 
Hg1 Hg2 3.5551(9) 2_565 ? 
Hg1 Br1 3.6102(19) . ? 
Hg1 I1 3.6102(19) 1_565 ? 
Hg1 Br1 3.6102(19) 1_565 ? 
Hg1 Ag' 3.824(15) 6_666 ? 
Hg1 Ag' 3.824(15) 5_556 ? 
Hg1 Ag' 3.824(15) 6_656 ? 
Hg1 Ag' 3.824(15) 5_566 ? 
Hg1 Ag 4.107(14) 6_666 ? 
Hg1 Ag 4.107(14) 5_556 ? 
Hg1 Ag 4.107(14) 6_656 ? 
Hg1 Ag 4.107(14) 5_566 ? 
Hg2 S 2.366(5) 6_556 ? 
Hg2 S 2.366(5) 2_565 ? 
Hg2 I1 3.3986(2) 5_556 ? 
Hg2 I1 3.3986(2) 1_565 ? 
Hg2 Br1 3.3986(2) 5_556 ? 
Hg2 Br1 3.3986(2) 1_565 ? 
Hg2 I1 3.3986(2) 5_566 ? 
Hg2 Br1 3.3986(2) . ? 
Hg2 Br1 3.3986(2) 5_566 ? 
Hg2 Hg1 3.5551(9) 5_566 ? 
Hg2 Ag 3.699(12) 5_566 ? 
Hg2 Ag 3.699(12) . ? 
Hg2 Ag 3.699(12) 5_556 ? 
Hg2 Ag 3.699(12) 1_565 ? 
Hg2 Ag' 3.888(14) . ? 
Hg2 Ag' 3.888(14) 5_566 ? 
Hg2 Ag' 3.888(14) 5_556 ? 
Hg2 Ag' 3.888(14) 1_565 ? 
Ag Ag' 0.52(2) . ? 
Ag S 2.558(8) 6_546 ? 
Ag S 2.558(8) 6_556 ? 
Ag I2 2.795(17) 1_554 ? 
Ag Br2 2.795(17) 1_554 ? 
Ag Br1 2.966(12) . ? 
Ag Ag 3.15(3) 2 ? 
Ag Ag' 3.556(10) 2 ? 
Ag Hg2 3.699(12) 1_545 ? 
Ag I2 3.991(13) 5_556 ? 
Ag Br2 3.991(13) 5_556 ? 
Ag Hg1 4.107(14) 5_556 ? 
Ag Hg1 4.107(14) 5_566 ? 
Ag Ag' 4.316(11) 5 ? 
Ag I1 4.507(18) 5_556 ? 
Ag Br1 4.507(18) 5_556 ? 
Ag Ag 4.6209(2) 1_565 ? 
Ag Ag 4.6209(2) 1_545 ? 
Ag' S 2.504(8) 6_556 ? 
Ag' S 2.504(8) 6_546 ? 
Ag' I2 2.780(19) 1_554 ? 
Ag' Br2 2.780(19) 1_554 ? 
Ag' Br1 3.466(14) . ? 
Ag' I2 3.479(14) 5_556 ? 
Ag' Br2 3.479(14) 5_556 ? 
Ag' Ag 3.556(10) 2 ? 
Ag' Hg1 3.824(14) 5_556 ? 
Ag' Hg1 3.824(14) 5_566 ? 
Ag' Ag' 3.87(3) 5 ? 
Ag' Hg2 3.888(14) 1_545 ? 
Ag' Ag' 3.93(3) 2 ? 
Ag' Ag 4.316(11) 5 ? 
Ag' I1 4.469(19) 5_556 ? 
Ag' Br1 4.469(19) 5_556 ? 
Ag' Ag' 4.6209(2) 1_565 ? 
Br1 Ag 2.966(12) 2 ? 
Br1 Hg2 3.3986(2) 2_565 ? 
Br1 Hg2 3.3986(2) 1_545 ? 
Br1 Hg2 3.3986(2) 2 ? 
Br1 Ag' 3.466(14) 2 ? 
Br1 Hg1 3.6102(19) 1_545 ? 
Br1 Ag' 4.469(19) 6_656 ? 
Br1 Ag' 4.469(19) 5_556 ? 
Br2 Ag' 2.780(19) 2_556 ? 
Br2 Ag' 2.780(19) 1_556 ? 
Br2 Ag 2.795(17) 2_556 ? 
Br2 Ag 2.795(17) 1_556 ? 
Br2 Hg1 3.2626(14) 1_545 ? 
Br2 Ag' 3.479(15) 5_556 ? 
Br2 Ag' 3.479(15) 6_656 ? 
Br2 Ag 3.991(13) 5_556 ? 
Br2 Ag 3.991(13) 6_656 ? 
Br2 Ag' 5.393(10) 2_566 ? 
Br2 Ag' 5.393(10) 1_546 ? 
S Hg2 2.366(5) 2_565 ? 
S Ag' 2.504(8) 6_666 ? 
S Ag' 2.504(8) 6_656 ? 
S Ag 2.558(8) 6_666 ? 
S Ag 2.558(8) 6_656 ? 
S Ag 4.791(15) 5_666 ? 
S Ag 4.791(15) 5_656 ? 
S Ag' 5.032(15) 2_566 ? 
S Ag' 5.032(15) 2_556 ? 
S Ag' 5.171(16) 5_666 ? 
S Ag' 5.171(16) 5_656 ? 
 
loop_ 
 _geom_angle_atom_site_label_1 
 _geom_angle_atom_site_label_2 
 _geom_angle_atom_site_label_3 
 _geom_angle 
 _geom_angle_site_symmetry_1 
 _geom_angle_site_symmetry_3 
 _geom_angle_publ_flag 
S Hg1 S 171.2(2) . 2_565 ? 
S Hg1 I2 93.12(8) . 1_565 ? 
S Hg1 I2 93.12(8) 2_565 1_565 ? 
S Hg1 Br2 93.12(8) . 1_565 ? 
S Hg1 Br2 93.12(8) 2_565 1_565 ? 
I2 Hg1 Br2 0.00(4) 1_565 1_565 ? 
S Hg1 Br2 93.12(8) . . ? 
S Hg1 Br2 93.12(8) 2_565 . ? 
I2 Hg1 Br2 90.17(5) 1_565 . ? 
Br2 Hg1 Br2 90.17(5) 1_565 . ? 
S Hg1 Hg2 129.86(12) . . ? 
S Hg1 Hg2 41.31(12) 2_565 . ? 
I2 Hg1 Hg2 120.366(12) 1_565 . ? 
Br2 Hg1 Hg2 120.366(12) 1_565 . ? 
Br2 Hg1 Hg2 120.366(12) . . ? 
S Hg1 Hg2 41.31(12) . 2_565 ? 
S Hg1 Hg2 129.86(12) 2_565 2_565 ? 
I2 Hg1 Hg2 120.366(12) 1_565 2_565 ? 
Br2 Hg1 Hg2 120.366(12) 1_565 2_565 ? 
Br2 Hg1 Hg2 120.366(12) . 2_565 ? 
Hg2 Hg1 Hg2 88.55(3) . 2_565 ? 
S Hg1 Br1 86.61(9) . . ? 
S Hg1 Br1 86.61(9) 2_565 . ? 
I2 Hg1 Br1 174.70(4) 1_565 . ? 
Br2 Hg1 Br1 174.70(4) 1_565 . ? 
Br2 Hg1 Br1 95.12(3) . . ? 
Hg2 Hg1 Br1 56.62(2) . . ? 
Hg2 Hg1 Br1 56.62(2) 2_565 . ? 
S Hg1 I1 86.61(9) . 1_565 ? 
S Hg1 I1 86.61(9) 2_565 1_565 ? 
I2 Hg1 I1 95.12(3) 1_565 1_565 ? 
Br2 Hg1 I1 95.12(3) 1_565 1_565 ? 
Br2 Hg1 I1 174.70(4) . 1_565 ? 
Hg2 Hg1 I1 56.62(2) . 1_565 ? 
Hg2 Hg1 I1 56.62(2) 2_565 1_565 ? 
Br1 Hg1 I1 79.58(5) . 1_565 ? 
S Hg1 Br1 86.61(9) . 1_565 ? 
S Hg1 Br1 86.61(9) 2_565 1_565 ? 
I2 Hg1 Br1 95.12(3) 1_565 1_565 ? 
Br2 Hg1 Br1 95.12(3) 1_565 1_565 ? 
Br2 Hg1 Br1 174.70(4) . 1_565 ? 
Hg2 Hg1 Br1 56.62(2) . 1_565 ? 
Hg2 Hg1 Br1 56.62(2) 2_565 1_565 ? 
Br1 Hg1 Br1 79.58(5) . 1_565 ? 
I1 Hg1 Br1 0.00(4) 1_565 1_565 ? 
S Hg1 Ag' 39.55(16) . 6_666 ? 
S Hg1 Ag' 142.45(16) 2_565 6_666 ? 
I2 Hg1 Ag' 58.17(18) 1_565 6_666 ? 
Br2 Hg1 Ag' 58.17(18) 1_565 6_666 ? 
Br2 Hg1 Ag' 109.2(2) . 6_666 ? 
Hg2 Hg1 Ag' 130.4(2) . 6_666 ? 
Hg2 Hg1 Ag' 63.5(2) 2_565 6_666 ? 
Br1 Hg1 Ag' 119.67(19) . 6_666 ? 
I1 Hg1 Ag' 73.8(2) 1_565 6_666 ? 
Br1 Hg1 Ag' 73.8(2) 1_565 6_666 ? 
S Hg1 Ag' 142.45(16) . 5_556 ? 
S Hg1 Ag' 39.55(16) 2_565 5_556 ? 
I2 Hg1 Ag' 109.2(2) 1_565 5_556 ? 
Br2 Hg1 Ag' 109.2(2) 1_565 5_556 ? 
Br2 Hg1 Ag' 58.17(18) . 5_556 ? 
Hg2 Hg1 Ag' 63.5(2) . 5_556 ? 
Hg2 Hg1 Ag' 130.4(2) 2_565 5_556 ? 
Br1 Hg1 Ag' 73.8(2) . 5_556 ? 
I1 Hg1 Ag' 119.67(19) 1_565 5_556 ? 
Br1 Hg1 Ag' 119.67(19) 1_565 5_556 ? 
Ag' Hg1 Ag' 163.8(5) 6_666 5_556 ? 
S Hg1 Ag' 39.55(16) . 6_656 ? 
S Hg1 Ag' 142.45(16) 2_565 6_656 ? 
I2 Hg1 Ag' 109.2(2) 1_565 6_656 ? 
Br2 Hg1 Ag' 109.2(2) 1_565 6_656 ? 
Br2 Hg1 Ag' 58.17(18) . 6_656 ? 
Hg2 Hg1 Ag' 130.4(2) . 6_656 ? 
Hg2 Hg1 Ag' 63.5(2) 2_565 6_656 ? 
Br1 Hg1 Ag' 73.8(2) . 6_656 ? 
I1 Hg1 Ag' 119.67(19) 1_565 6_656 ? 
Br1 Hg1 Ag' 119.67(19) 1_565 6_656 ? 
Ag' Hg1 Ag' 74.3(3) 6_666 6_656 ? 
Ag' Hg1 Ag' 103.3(3) 5_556 6_656 ? 
S Hg1 Ag' 142.45(16) . 5_566 ? 
S Hg1 Ag' 39.55(16) 2_565 5_566 ? 
I2 Hg1 Ag' 58.17(18) 1_565 5_566 ? 
Br2 Hg1 Ag' 58.17(18) 1_565 5_566 ? 
Br2 Hg1 Ag' 109.2(2) . 5_566 ? 
Hg2 Hg1 Ag' 63.5(2) . 5_566 ? 
Hg2 Hg1 Ag' 130.4(2) 2_565 5_566 ? 
Br1 Hg1 Ag' 119.67(19) . 5_566 ? 
I1 Hg1 Ag' 73.8(2) 1_565 5_566 ? 
Br1 Hg1 Ag' 73.8(2) 1_565 5_566 ? 
Ag' Hg1 Ag' 103.3(3) 6_666 5_566 ? 
Ag' Hg1 Ag' 74.3(3) 5_556 5_566 ? 
Ag' Hg1 Ag' 163.8(5) 6_656 5_566 ? 
S Hg1 Ag 35.00(12) . 6_666 ? 
S Hg1 Ag 145.75(14) 2_565 6_666 ? 
I2 Hg1 Ag 64.39(14) 1_565 6_666 ? 
Br2 Hg1 Ag 64.39(14) 1_565 6_666 ? 
Br2 Hg1 Ag 111.38(19) . 6_666 ? 
Hg2 Hg1 Ag 127.63(19) . 6_666 ? 
Hg2 Hg1 Ag 57.19(16) 2_565 6_666 ? 
Br1 Hg1 Ag 113.38(15) . 6_666 ? 
I1 Hg1 Ag 71.14(19) 1_565 6_666 ? 
Br1 Hg1 Ag 71.14(19) 1_565 6_666 ? 
Ag' Hg1 Ag 6.3(3) 6_666 6_666 ? 
Ag' Hg1 Ag 168.65(16) 5_556 6_666 ? 
Ag' Hg1 Ag 71.69(8) 6_656 6_666 ? 
Ag' Hg1 Ag 107.49(10) 5_566 6_666 ? 
S Hg1 Ag 145.75(14) . 5_556 ? 
S Hg1 Ag 35.00(12) 2_565 5_556 ? 
I2 Hg1 Ag 111.38(19) 1_565 5_556 ? 
Br2 Hg1 Ag 111.38(19) 1_565 5_556 ? 
Br2 Hg1 Ag 64.39(14) . 5_556 ? 
Hg2 Hg1 Ag 57.19(16) . 5_556 ? 
Hg2 Hg1 Ag 127.63(19) 2_565 5_556 ? 
Br1 Hg1 Ag 71.14(19) . 5_556 ? 
I1 Hg1 Ag 113.38(15) 1_565 5_556 ? 
Br1 Hg1 Ag 113.38(15) 1_565 5_556 ? 
Ag' Hg1 Ag 168.65(16) 6_666 5_556 ? 
Ag' Hg1 Ag 6.3(3) 5_556 5_556 ? 
Ag' Hg1 Ag 107.49(10) 6_656 5_556 ? 
Ag' Hg1 Ag 71.69(8) 5_566 5_556 ? 
Ag Hg1 Ag 174.5(4) 6_666 5_556 ? 
S Hg1 Ag 35.00(12) . 6_656 ? 
S Hg1 Ag 145.75(14) 2_565 6_656 ? 
I2 Hg1 Ag 111.38(19) 1_565 6_656 ? 
Br2 Hg1 Ag 111.38(19) 1_565 6_656 ? 
Br2 Hg1 Ag 64.39(14) . 6_656 ? 
Hg2 Hg1 Ag 127.63(19) . 6_656 ? 
Hg2 Hg1 Ag 57.19(16) 2_565 6_656 ? 
Br1 Hg1 Ag 71.14(19) . 6_656 ? 
I1 Hg1 Ag 113.38(15) 1_565 6_656 ? 
Br1 Hg1 Ag 113.38(15) 1_565 6_656 ? 
Ag' Hg1 Ag 71.69(8) 6_666 6_656 ? 
Ag' Hg1 Ag 107.49(10) 5_556 6_656 ? 
Ag' Hg1 Ag 6.3(3) 6_656 6_656 ? 
Ag' Hg1 Ag 168.65(16) 5_566 6_656 ? 
Ag Hg1 Ag 68.5(3) 6_666 6_656 ? 
Ag Hg1 Ag 111.2(3) 5_556 6_656 ? 
S Hg1 Ag 145.75(14) . 5_566 ? 
S Hg1 Ag 35.00(12) 2_565 5_566 ? 
I2 Hg1 Ag 64.39(14) 1_565 5_566 ? 
Br2 Hg1 Ag 64.39(14) 1_565 5_566 ? 
Br2 Hg1 Ag 111.38(19) . 5_566 ? 
Hg2 Hg1 Ag 57.19(16) . 5_566 ? 
Hg2 Hg1 Ag 127.63(19) 2_565 5_566 ? 
Br1 Hg1 Ag 113.38(15) . 5_566 ? 
I1 Hg1 Ag 71.14(19) 1_565 5_566 ? 
Br1 Hg1 Ag 71.14(19) 1_565 5_566 ? 
Ag' Hg1 Ag 107.49(10) 6_666 5_566 ? 
Ag' Hg1 Ag 71.69(8) 5_556 5_566 ? 
Ag' Hg1 Ag 168.65(16) 6_656 5_566 ? 
Ag' Hg1 Ag 6.3(3) 5_566 5_566 ? 
Ag Hg1 Ag 111.2(3) 6_666 5_566 ? 
Ag Hg1 Ag 68.5(3) 5_556 5_566 ? 
Ag Hg1 Ag 174.5(4) 6_656 5_566 ? 
S Hg2 S 180.000(1) 6_556 2_565 ? 
S Hg2 I1 91.67(9) 6_556 5_556 ? 
S Hg2 I1 88.33(9) 2_565 5_556 ? 
S Hg2 I1 88.33(9) 6_556 1_565 ? 
S Hg2 I1 91.67(9) 2_565 1_565 ? 
I1 Hg2 I1 180.0 5_556 1_565 ? 
S Hg2 Br1 91.67(9) 6_556 5_556 ? 
S Hg2 Br1 88.33(9) 2_565 5_556 ? 
I1 Hg2 Br1 0.0 5_556 5_556 ? 
I1 Hg2 Br1 180.0 1_565 5_556 ? 
S Hg2 Br1 88.33(9) 6_556 1_565 ? 
S Hg2 Br1 91.67(9) 2_565 1_565 ? 
I1 Hg2 Br1 180.0 5_556 1_565 ? 
I1 Hg2 Br1 0.00(7) 1_565 1_565 ? 
Br1 Hg2 Br1 180.0 5_556 1_565 ? 
S Hg2 I1 91.67(9) 6_556 5_566 ? 
S Hg2 I1 88.33(9) 2_565 5_566 ? 
I1 Hg2 I1 85.661(7) 5_556 5_566 ? 
I1 Hg2 I1 94.339(7) 1_565 5_566 ? 
Br1 Hg2 I1 85.661(7) 5_556 5_566 ? 
Br1 Hg2 I1 94.339(7) 1_565 5_566 ? 
S Hg2 Br1 88.33(9) 6_556 . ? 
S Hg2 Br1 91.67(9) 2_565 . ? 
I1 Hg2 Br1 94.339(7) 5_556 . ? 
I1 Hg2 Br1 85.661(7) 1_565 . ? 
Br1 Hg2 Br1 94.339(7) 5_556 . ? 
Br1 Hg2 Br1 85.661(7) 1_565 . ? 
I1 Hg2 Br1 180.0 5_566 . ? 
S Hg2 Br1 91.67(9) 6_556 5_566 ? 
S Hg2 Br1 88.33(9) 2_565 5_566 ? 
I1 Hg2 Br1 85.661(7) 5_556 5_566 ? 
I1 Hg2 Br1 94.339(7) 1_565 5_566 ? 
Br1 Hg2 Br1 85.661(7) 5_556 5_566 ? 
Br1 Hg2 Br1 94.339(7) 1_565 5_566 ? 
I1 Hg2 Br1 0.0 5_566 5_566 ? 
Br1 Hg2 Br1 180.0 . 5_566 ? 
S Hg2 Hg1 138.71(12) 6_556 . ? 
S Hg2 Hg1 41.29(12) 2_565 . ? 
I1 Hg2 Hg1 117.49(3) 5_556 . ? 
I1 Hg2 Hg1 62.51(3) 1_565 . ? 
Br1 Hg2 Hg1 117.49(3) 5_556 . ? 
Br1 Hg2 Hg1 62.51(3) 1_565 . ? 
I1 Hg2 Hg1 117.49(3) 5_566 . ? 
Br1 Hg2 Hg1 62.51(3) . . ? 
Br1 Hg2 Hg1 117.49(3) 5_566 . ? 
S Hg2 Hg1 41.29(12) 6_556 5_566 ? 
S Hg2 Hg1 138.71(12) 2_565 5_566 ? 
I1 Hg2 Hg1 62.51(3) 5_556 5_566 ? 
I1 Hg2 Hg1 117.49(3) 1_565 5_566 ? 
Br1 Hg2 Hg1 62.51(3) 5_556 5_566 ? 
Br1 Hg2 Hg1 117.49(3) 1_565 5_566 ? 
I1 Hg2 Hg1 62.51(3) 5_566 5_566 ? 
Br1 Hg2 Hg1 117.49(3) . 5_566 ? 
Br1 Hg2 Hg1 62.51(3) 5_566 5_566 ? 
Hg1 Hg2 Hg1 180.0 . 5_566 ? 
S Hg2 Ag 136.68(15) 6_556 5_566 ? 
S Hg2 Ag 43.32(15) 2_565 5_566 ? 
I1 Hg2 Ag 101.3(2) 5_556 5_566 ? 
I1 Hg2 Ag 78.7(2) 1_565 5_566 ? 
Br1 Hg2 Ag 101.3(2) 5_556 5_566 ? 
Br1 Hg2 Ag 78.7(2) 1_565 5_566 ? 
I1 Hg2 Ag 49.18(19) 5_566 5_566 ? 
Br1 Hg2 Ag 130.82(19) . 5_566 ? 
Br1 Hg2 Ag 49.18(19) 5_566 5_566 ? 
Hg1 Hg2 Ag 68.9(2) . 5_566 ? 
Hg1 Hg2 Ag 111.1(2) 5_566 5_566 ? 
S Hg2 Ag 43.32(15) 6_556 . ? 
S Hg2 Ag 136.68(15) 2_565 . ? 
I1 Hg2 Ag 78.7(2) 5_556 . ? 
I1 Hg2 Ag 101.3(2) 1_565 . ? 
Br1 Hg2 Ag 78.7(2) 5_556 . ? 
Br1 Hg2 Ag 101.3(2) 1_565 . ? 
I1 Hg2 Ag 130.82(19) 5_566 . ? 
Br1 Hg2 Ag 49.18(19) . . ? 
Br1 Hg2 Ag 130.82(19) 5_566 . ? 
Hg1 Hg2 Ag 111.1(2) . . ? 
Hg1 Hg2 Ag 68.9(2) 5_566 . ? 
Ag Hg2 Ag 180.0 5_566 . ? 
S Hg2 Ag 136.68(15) 6_556 5_556 ? 
S Hg2 Ag 43.32(15) 2_565 5_556 ? 
I1 Hg2 Ag 49.18(19) 5_556 5_556 ? 
I1 Hg2 Ag 130.82(19) 1_565 5_556 ? 
Br1 Hg2 Ag 49.18(19) 5_556 5_556 ? 
Br1 Hg2 Ag 130.82(19) 1_565 5_556 ? 
I1 Hg2 Ag 101.3(2) 5_566 5_556 ? 
Br1 Hg2 Ag 78.7(2) . 5_556 ? 
Br1 Hg2 Ag 101.3(2) 5_566 5_556 ? 
Hg1 Hg2 Ag 68.9(2) . 5_556 ? 
Hg1 Hg2 Ag 111.1(2) 5_566 5_556 ? 
Ag Hg2 Ag 77.3(3) 5_566 5_556 ? 
Ag Hg2 Ag 102.7(3) . 5_556 ? 
S Hg2 Ag 43.32(15) 6_556 1_565 ? 
S Hg2 Ag 136.68(15) 2_565 1_565 ? 
I1 Hg2 Ag 130.82(19) 5_556 1_565 ? 
I1 Hg2 Ag 49.18(19) 1_565 1_565 ? 
Br1 Hg2 Ag 130.82(19) 5_556 1_565 ? 
Br1 Hg2 Ag 49.18(19) 1_565 1_565 ? 
I1 Hg2 Ag 78.7(2) 5_566 1_565 ? 
Br1 Hg2 Ag 101.3(2) . 1_565 ? 
Br1 Hg2 Ag 78.7(2) 5_566 1_565 ? 
Hg1 Hg2 Ag 111.1(2) . 1_565 ? 
Hg1 Hg2 Ag 68.9(2) 5_566 1_565 ? 
Ag Hg2 Ag 102.7(3) 5_566 1_565 ? 
Ag Hg2 Ag 77.3(3) . 1_565 ? 
Ag Hg2 Ag 180.0 5_556 1_565 ? 
S Hg2 Ag' 38.26(14) 6_556 . ? 
S Hg2 Ag' 141.74(14) 2_565 . ? 
I1 Hg2 Ag' 75.3(2) 5_556 . ? 
I1 Hg2 Ag' 104.7(2) 1_565 . ? 
Br1 Hg2 Ag' 75.3(2) 5_556 . ? 
Br1 Hg2 Ag' 104.7(2) 1_565 . ? 
I1 Hg2 Ag' 123.7(2) 5_566 . ? 
Br1 Hg2 Ag' 56.3(2) . . ? 
Br1 Hg2 Ag' 123.7(2) 5_566 . ? 
Hg1 Hg2 Ag' 118.4(2) . . ? 
Hg1 Hg2 Ag' 61.6(2) 5_566 . ? 
Ag Hg2 Ag' 172.7(4) 5_566 . ? 
Ag Hg2 Ag' 7.3(4) . . ? 
Ag Hg2 Ag' 104.45(8) 5_556 . ? 
Ag Hg2 Ag' 75.55(8) 1_565 . ? 
S Hg2 Ag' 141.74(14) 6_556 5_566 ? 
S Hg2 Ag' 38.26(14) 2_565 5_566 ? 
I1 Hg2 Ag' 104.7(2) 5_556 5_566 ? 
I1 Hg2 Ag' 75.3(2) 1_565 5_566 ? 
Br1 Hg2 Ag' 104.7(2) 5_556 5_566 ? 
Br1 Hg2 Ag' 75.3(2) 1_565 5_566 ? 
I1 Hg2 Ag' 56.3(2) 5_566 5_566 ? 
Br1 Hg2 Ag' 123.7(2) . 5_566 ? 
Br1 Hg2 Ag' 56.3(2) 5_566 5_566 ? 
Hg1 Hg2 Ag' 61.6(2) . 5_566 ? 
Hg1 Hg2 Ag' 118.4(2) 5_566 5_566 ? 
Ag Hg2 Ag' 7.3(4) 5_566 5_566 ? 
Ag Hg2 Ag' 172.7(4) . 5_566 ? 
Ag Hg2 Ag' 75.55(8) 5_556 5_566 ? 
Ag Hg2 Ag' 104.45(8) 1_565 5_566 ? 
Ag' Hg2 Ag' 180.0(3) . 5_566 ? 
S Hg2 Ag' 141.74(14) 6_556 5_556 ? 
S Hg2 Ag' 38.26(14) 2_565 5_556 ? 
I1 Hg2 Ag' 56.3(2) 5_556 5_556 ? 
I1 Hg2 Ag' 123.7(2) 1_565 5_556 ? 
Br1 Hg2 Ag' 56.3(2) 5_556 5_556 ? 
Br1 Hg2 Ag' 123.7(2) 1_565 5_556 ? 
I1 Hg2 Ag' 104.7(2) 5_566 5_556 ? 
Br1 Hg2 Ag' 75.3(2) . 5_556 ? 
Br1 Hg2 Ag' 104.7(2) 5_566 5_556 ? 
Hg1 Hg2 Ag' 61.6(2) . 5_556 ? 
Hg1 Hg2 Ag' 118.4(2) 5_566 5_556 ? 
Ag Hg2 Ag' 75.55(8) 5_566 5_556 ? 
Ag Hg2 Ag' 104.45(8) . 5_556 ? 
Ag Hg2 Ag' 7.3(4) 5_556 5_556 ? 
Ag Hg2 Ag' 172.7(4) 1_565 5_556 ? 
Ag' Hg2 Ag' 107.1(3) . 5_556 ? 
Ag' Hg2 Ag' 72.9(3) 5_566 5_556 ? 
S Hg2 Ag' 38.26(14) 6_556 1_565 ? 
S Hg2 Ag' 141.74(14) 2_565 1_565 ? 
I1 Hg2 Ag' 123.7(2) 5_556 1_565 ? 
I1 Hg2 Ag' 56.3(2) 1_565 1_565 ? 
Br1 Hg2 Ag' 123.7(2) 5_556 1_565 ? 
Br1 Hg2 Ag' 56.3(2) 1_565 1_565 ? 
I1 Hg2 Ag' 75.3(2) 5_566 1_565 ? 
Br1 Hg2 Ag' 104.7(2) . 1_565 ? 
Br1 Hg2 Ag' 75.3(2) 5_566 1_565 ? 
Hg1 Hg2 Ag' 118.4(2) . 1_565 ? 
Hg1 Hg2 Ag' 61.6(2) 5_566 1_565 ? 
Ag Hg2 Ag' 104.45(8) 5_566 1_565 ? 
Ag Hg2 Ag' 75.55(8) . 1_565 ? 
Ag Hg2 Ag' 172.7(4) 5_556 1_565 ? 
Ag Hg2 Ag' 7.3(4) 1_565 1_565 ? 
Ag' Hg2 Ag' 72.9(3) . 1_565 ? 
Ag' Hg2 Ag' 107.1(3) 5_566 1_565 ? 
Ag' Hg2 Ag' 180.000(1) 5_556 1_565 ? 
Ag' Ag S 78.1(16) . 6_546 ? 
Ag' Ag S 78.1(16) . 6_556 ? 
S Ag S 129.1(7) 6_546 6_556 ? 
Ag' Ag I2 83(4) . 1_554 ? 
S Ag I2 110.5(4) 6_546 1_554 ? 
S Ag I2 110.5(4) 6_556 1_554 ? 
Ag' Ag Br2 83(4) . 1_554 ? 
S Ag Br2 110.5(4) 6_546 1_554 ? 
S Ag Br2 110.5(4) 6_556 1_554 ? 
I2 Ag Br2 0.00(4) 1_554 1_554 ? 
Ag' Ag Br1 163(4) . . ? 
S Ag Br1 95.1(3) 6_546 . ? 
S Ag Br1 95.1(3) 6_556 . ? 
I2 Ag Br1 113.7(5) 1_554 . ? 
Br2 Ag Br1 113.7(5) 1_554 . ? 
Ag' Ag Ag 139(4) . 2 ? 
S Ag Ag 113.8(3) 6_546 2 ? 
S Ag Ag 113.8(3) 6_556 2 ? 
I2 Ag Ag 55.7(3) 1_554 2 ? 
Br2 Ag Ag 55.7(3) 1_554 2 ? 
Br1 Ag Ag 57.9(3) . 2 ? 
Ag' Ag Ag' 133(4) . 2 ? 
S Ag Ag' 114.5(3) 6_546 2 ? 
S Ag Ag' 114.5(3) 6_556 2 ? 
I2 Ag Ag' 50.2(5) 1_554 2 ? 
Br2 Ag Ag' 50.2(5) 1_554 2 ? 
Br1 Ag Ag' 63.5(3) . 2 ? 
Ag Ag Ag' 5.5(5) 2 2 ? 
Ag' Ag Hg2 108(3) . . ? 
S Ag Hg2 110.8(5) 6_546 . ? 
S Ag Hg2 39.4(2) 6_556 . ? 
I2 Ag Hg2 138.7(3) 1_554 . ? 
Br2 Ag Hg2 138.7(3) 1_554 . ? 
Br1 Ag Hg2 60.1(2) . . ? 
Ag Ag Hg2 104.2(2) 2 . ? 
Ag' Ag Hg2 108.4(3) 2 . ? 
Ag' Ag Hg2 108(3) . 1_545 ? 
S Ag Hg2 39.4(2) 6_546 1_545 ? 
S Ag Hg2 110.8(5) 6_556 1_545 ? 
I2 Ag Hg2 138.7(3) 1_554 1_545 ? 
Br2 Ag Hg2 138.7(3) 1_554 1_545 ? 
Br1 Ag Hg2 60.1(2) . 1_545 ? 
Ag Ag Hg2 104.2(2) 2 1_545 ? 
Ag' Ag Hg2 108.4(3) 2 1_545 ? 
Hg2 Ag Hg2 77.3(3) . 1_545 ? 
Ag' Ag I2 9(4) . 5_556 ? 
S Ag I2 74.7(3) 6_546 5_556 ? 
S Ag I2 74.7(3) 6_556 5_556 ? 
I2 Ag I2 92.4(3) 1_554 5_556 ? 
Br2 Ag I2 92.4(3) 1_554 5_556 ? 
Br1 Ag I2 153.9(6) . 5_556 ? 
Ag Ag I2 148.1(2) 2 5_556 ? 
Ag' Ag I2 142.6(7) 2 5_556 ? 
Hg2 Ag I2 100.5(3) . 5_556 ? 
Hg2 Ag I2 100.5(3) 1_545 5_556 ? 
Ag' Ag Br2 9(4) . 5_556 ? 
S Ag Br2 74.7(3) 6_546 5_556 ? 
S Ag Br2 74.7(3) 6_556 5_556 ? 
I2 Ag Br2 92.4(3) 1_554 5_556 ? 
Br2 Ag Br2 92.4(3) 1_554 5_556 ? 
Br1 Ag Br2 153.9(6) . 5_556 ? 
Ag Ag Br2 148.1(2) 2 5_556 ? 
Ag' Ag Br2 142.6(7) 2 5_556 ? 
Hg2 Ag Br2 100.5(3) . 5_556 ? 
Hg2 Ag Br2 100.5(3) 1_545 5_556 ? 
I2 Ag Br2 0.00(4) 5_556 5_556 ? 
Ag' Ag Hg1 54(3) . 5_556 ? 
S Ag Hg1 32.0(2) 6_546 5_556 ? 
S Ag Hg1 99.7(5) 6_556 5_556 ? 
I2 Ag Hg1 120.3(3) 1_554 5_556 ? 
Br2 Ag Hg1 120.3(3) 1_554 5_556 ? 
Br1 Ag Hg1 113.4(4) . 5_556 ? 
Ag Ag Hg1 145.62(13) 2 5_556 ? 
Ag' Ag Hg1 145.70(15) 2 5_556 ? 
Hg2 Ag Hg1 96.5(4) . 5_556 ? 
Hg2 Ag Hg1 53.88(18) 1_545 5_556 ? 
I2 Ag Hg1 47.49(16) 5_556 5_556 ? 
Br2 Ag Hg1 47.49(16) 5_556 5_556 ? 
Ag' Ag Hg1 54(3) . 5_566 ? 
S Ag Hg1 99.7(5) 6_546 5_566 ? 
S Ag Hg1 32.0(2) 6_556 5_566 ? 
I2 Ag Hg1 120.3(3) 1_554 5_566 ? 
Br2 Ag Hg1 120.3(3) 1_554 5_566 ? 
Br1 Ag Hg1 113.4(4) . 5_566 ? 
Ag Ag Hg1 145.62(13) 2 5_566 ? 
Ag' Ag Hg1 145.70(15) 2 5_566 ? 
Hg2 Ag Hg1 53.88(18) . 5_566 ? 
Hg2 Ag Hg1 96.5(4) 1_545 5_566 ? 
I2 Ag Hg1 47.49(16) 5_556 5_566 ? 
Br2 Ag Hg1 47.49(16) 5_556 5_566 ? 
Hg1 Ag Hg1 68.5(3) 5_556 5_566 ? 
Ag' Ag Ag' 29(4) . 5 ? 
S Ag Ag' 90.4(3) 6_546 5 ? 
S Ag Ag' 90.4(3) 6_556 5 ? 
I2 Ag Ag' 53.6(3) 1_554 5 ? 
Br2 Ag Ag' 53.6(3) 1_554 5 ? 
Br1 Ag Ag' 167.2(4) . 5 ? 
Ag Ag Ag' 109.27(10) 2 5 ? 
Ag' Ag Ag' 103.8(5) 2 5 ? 
Hg2 Ag Ag' 128.23(19) . 5 ? 
Hg2 Ag Ag' 128.23(19) 1_545 5 ? 
I2 Ag Ag' 38.9(3) 5_556 5 ? 
Br2 Ag Ag' 38.9(3) 5_556 5 ? 
Hg1 Ag Ag' 76.9(2) 5_556 5 ? 
Hg1 Ag Ag' 76.9(2) 5_566 5 ? 
Ag' Ag I1 82(4) . 5_556 ? 
S Ag I1 66.4(4) 6_546 5_556 ? 
S Ag I1 66.4(4) 6_556 5_556 ? 
I2 Ag I1 165.5(4) 1_554 5_556 ? 
Br2 Ag I1 165.5(4) 1_554 5_556 ? 
Br1 Ag I1 80.8(3) . 5_556 ? 
Ag Ag I1 138.76(15) 2 5_556 ? 
Ag' Ag I1 144.3(5) 2 5_556 ? 
Hg2 Ag I1 47.7(2) . 5_556 ? 
Hg2 Ag I1 47.7(2) 1_545 5_556 ? 
I2 Ag I1 73.1(3) 5_556 5_556 ? 
Br2 Ag I1 73.1(3) 5_556 5_556 ? 
Hg1 Ag I1 49.29(19) 5_556 5_556 ? 
Hg1 Ag I1 49.29(19) 5_566 5_556 ? 
Ag' Ag I1 112.0(2) 5 5_556 ? 
Ag' Ag Br1 82(4) . 5_556 ? 
S Ag Br1 66.4(4) 6_546 5_556 ? 
S Ag Br1 66.4(4) 6_556 5_556 ? 
I2 Ag Br1 165.5(4) 1_554 5_556 ? 
Br2 Ag Br1 165.5(4) 1_554 5_556 ? 
Br1 Ag Br1 80.8(3) . 5_556 ? 
Ag Ag Br1 138.76(15) 2 5_556 ? 
Ag' Ag Br1 144.3(5) 2 5_556 ? 
Hg2 Ag Br1 47.7(2) . 5_556 ? 
Hg2 Ag Br1 47.7(2) 1_545 5_556 ? 
I2 Ag Br1 73.1(3) 5_556 5_556 ? 
Br2 Ag Br1 73.1(3) 5_556 5_556 ? 
Hg1 Ag Br1 49.29(19) 5_556 5_556 ? 
Hg1 Ag Br1 49.29(19) 5_566 5_556 ? 
Ag' Ag Br1 112.0(2) 5 5_556 ? 
I1 Ag Br1 0.0 5_556 5_556 ? 
Ag' Ag Ag 90.000(3) . 1_565 ? 
S Ag Ag 154.6(4) 6_546 1_565 ? 
S Ag Ag 25.4(4) 6_556 1_565 ? 
I2 Ag Ag 90.0 1_554 1_565 ? 
Br2 Ag Ag 90.0 1_554 1_565 ? 
Br1 Ag Ag 90.0 . 1_565 ? 
Ag Ag Ag 90.000(1) 2 1_565 ? 
Ag' Ag Ag 90.0 2 1_565 ? 
Hg2 Ag Ag 51.34(15) . 1_565 ? 
Hg2 Ag Ag 128.66(15) 1_545 1_565 ? 
I2 Ag Ag 90.0 5_556 1_565 ? 
Br2 Ag Ag 90.0 5_556 1_565 ? 
Hg1 Ag Ag 124.24(13) 5_556 1_565 ? 
Hg1 Ag Ag 55.76(13) 5_566 1_565 ? 
Ag' Ag Ag 90.0 5 1_565 ? 
I1 Ag Ag 90.0 5_556 1_565 ? 
Br1 Ag Ag 90.0 5_556 1_565 ? 
Ag' Ag Ag 90.000(2) . 1_545 ? 
S Ag Ag 25.4(4) 6_546 1_545 ? 
S Ag Ag 154.6(4) 6_556 1_545 ? 
I2 Ag Ag 90.0 1_554 1_545 ? 
Br2 Ag Ag 90.0 1_554 1_545 ? 
Br1 Ag Ag 90.0 . 1_545 ? 
Ag Ag Ag 90.0 2 1_545 ? 
Ag' Ag Ag 90.0 2 1_545 ? 
Hg2 Ag Ag 128.66(15) . 1_545 ? 
Hg2 Ag Ag 51.34(15) 1_545 1_545 ? 
I2 Ag Ag 90.0 5_556 1_545 ? 
Br2 Ag Ag 90.0 5_556 1_545 ? 
Hg1 Ag Ag 55.76(13) 5_556 1_545 ? 
Hg1 Ag Ag 124.24(13) 5_566 1_545 ? 
Ag' Ag Ag 90.0 5 1_545 ? 
I1 Ag Ag 90.0 5_556 1_545 ? 
Br1 Ag Ag 90.0 5_556 1_545 ? 
Ag Ag Ag 180.0(7) 1_565 1_545 ? 
Ag Ag' S 90.1(15) . 6_556 ? 
Ag Ag' S 90.1(15) . 6_546 ? 
S Ag' S 134.7(8) 6_556 6_546 ? 
Ag Ag' I2 86(4) . 1_554 ? 
S Ag' I2 112.6(4) 6_556 1_554 ? 
S Ag' I2 112.6(4) 6_546 1_554 ? 
Ag Ag' Br2 86(4) . 1_554 ? 
S Ag' Br2 112.6(4) 6_556 1_554 ? 
S Ag' Br2 112.6(4) 6_546 1_554 ? 
I2 Ag' Br2 0.00(5) 1_554 1_554 ? 
Ag Ag' Br1 14(4) . . ? 
S Ag' Br1 84.7(3) 6_556 . ? 
S Ag' Br1 84.7(3) 6_546 . ? 
I2 Ag' Br1 100.5(5) 1_554 . ? 
Br2 Ag' Br1 100.5(5) 1_554 . ? 
Ag Ag' I2 169(4) . 5_556 ? 
S Ag' I2 85.7(4) 6_556 5_556 ? 
S Ag' I2 85.7(4) 6_546 5_556 ? 
I2 Ag' I2 104.5(4) 1_554 5_556 ? 
Br2 Ag' I2 104.5(4) 1_554 5_556 ? 
Br1 Ag' I2 155.0(6) . 5_556 ? 
Ag Ag' Br2 169(4) . 5_556 ? 
S Ag' Br2 85.7(4) 6_556 5_556 ? 
S Ag' Br2 85.7(4) 6_546 5_556 ? 
I2 Ag' Br2 104.5(4) 1_554 5_556 ? 
Br2 Ag' Br2 104.5(4) 1_554 5_556 ? 
Br1 Ag' Br2 155.0(6) . 5_556 ? 
I2 Ag' Br2 0.00(5) 5_556 5_556 ? 
Ag Ag' Ag 36(4) . 2 ? 
S Ag' Ag 103.1(4) 6_556 2 ? 
S Ag' Ag 103.1(4) 6_546 2 ? 
I2 Ag' Ag 50.6(4) 1_554 2 ? 
Br2 Ag' Ag 50.6(4) 1_554 2 ? 
Br1 Ag' Ag 49.9(3) . 2 ? 
I2 Ag' Ag 155.1(7) 5_556 2 ? 
Br2 Ag' Ag 155.1(7) 5_556 2 ? 
Ag Ag' Hg1 120(3) . 5_556 ? 
S Ag' Hg1 108.4(6) 6_556 5_556 ? 
S Ag' Hg1 37.0(2) 6_546 5_556 ? 
I2 Ag' Hg1 130.8(3) 1_554 5_556 ? 
Br2 Ag' Hg1 130.8(3) 1_554 5_556 ? 
Br1 Ag' Hg1 109.2(4) . 5_556 ? 
I2 Ag' Hg1 52.8(2) 5_556 5_556 ? 
Br2 Ag' Hg1 52.8(2) 5_556 5_556 ? 
Ag Ag' Hg1 140.1(2) 2 5_556 ? 
Ag Ag' Hg1 120(3) . 5_566 ? 
S Ag' Hg1 37.0(2) 6_556 5_566 ? 
S Ag' Hg1 108.4(6) 6_546 5_566 ? 
I2 Ag' Hg1 130.8(3) 1_554 5_566 ? 
Br2 Ag' Hg1 130.8(3) 1_554 5_566 ? 
Br1 Ag' Hg1 109.2(4) . 5_566 ? 
I2 Ag' Hg1 52.8(2) 5_556 5_566 ? 
Br2 Ag' Hg1 52.8(2) 5_556 5_566 ? 
Ag Ag' Hg1 140.1(2) 2 5_566 ? 
Hg1 Ag' Hg1 74.3(3) 5_556 5_566 ? 
Ag Ag' Ag' 147(5) . 5 ? 
S Ag' Ag' 102.1(4) 6_556 5 ? 
S Ag' Ag' 102.1(4) 6_546 5 ? 
I2 Ag' Ag' 60.5(5) 1_554 5 ? 
Br2 Ag' Ag' 60.5(5) 1_554 5 ? 
Br1 Ag' Ag' 161.0(9) . 5 ? 
I2 Ag' Ag' 44.0(3) 5_556 5 ? 
Br2 Ag' Ag' 44.0(3) 5_556 5 ? 
Ag Ag' Ag' 111.0(9) 2 5 ? 
Hg1 Ag' Ag' 85.8(4) 5_556 5 ? 
Hg1 Ag' Ag' 85.8(4) 5_566 5 ? 
Ag Ag' Hg2 65(3) . . ? 
S Ag' Hg2 35.8(2) 6_556 . ? 
S Ag' Hg2 106.6(5) 6_546 . ? 
I2 Ag' Hg2 130.9(3) 1_554 . ? 
Br2 Ag' Hg2 130.9(3) 1_554 . ? 
Br1 Ag' Hg2 54.7(2) . . ? 
I2 Ag' Hg2 106.7(4) 5_556 . ? 
Br2 Ag' Hg2 106.7(4) 5_556 . ? 
Ag Ag' Hg2 93.2(4) 2 . ? 
Hg1 Ag' Hg2 98.2(4) 5_556 . ? 
Hg1 Ag' Hg2 54.89(19) 5_566 . ? 
Ag' Ag' Hg2 136.8(4) 5 . ? 
Ag Ag' Hg2 65(3) . 1_545 ? 
S Ag' Hg2 106.6(5) 6_556 1_545 ? 
S Ag' Hg2 35.8(2) 6_546 1_545 ? 
I2 Ag' Hg2 130.9(3) 1_554 1_545 ? 
Br2 Ag' Hg2 130.9(3) 1_554 1_545 ? 
Br1 Ag' Hg2 54.7(2) . 1_545 ? 
I2 Ag' Hg2 106.7(4) 5_556 1_545 ? 
Br2 Ag' Hg2 106.7(4) 5_556 1_545 ? 
Ag Ag' Hg2 93.2(4) 2 1_545 ? 
Hg1 Ag' Hg2 54.89(19) 5_556 1_545 ? 
Hg1 Ag' Hg2 98.2(4) 5_566 1_545 ? 
Ag' Ag' Hg2 136.8(4) 5 1_545 ? 
Hg2 Ag' Hg2 72.9(3) . 1_545 ? 
Ag Ag' Ag' 41(4) . 2 ? 
S Ag' Ag' 104.8(4) 6_556 2 ? 
S Ag' Ag' 104.8(4) 6_546 2 ? 
I2 Ag' Ag' 45.0(3) 1_554 2 ? 
Br2 Ag' Ag' 45.0(3) 1_554 2 ? 
Br1 Ag' Ag' 55.5(3) . 2 ? 
I2 Ag' Ag' 149.5(3) 5_556 2 ? 
Br2 Ag' Ag' 149.5(3) 5_556 2 ? 
Ag Ag' Ag' 5.5(5) 2 2 ? 
Hg1 Ag' Ag' 141.65(15) 5_556 2 ? 
Hg1 Ag' Ag' 141.65(15) 5_566 2 ? 
Ag' Ag' Ag' 105.5(5) 5 2 ? 
Hg2 Ag' Ag' 97.6(2) . 2 ? 
Hg2 Ag' Ag' 97.6(2) 1_545 2 ? 
Ag Ag' Ag 151(4) . 5 ? 
S Ag' Ag 100.8(3) 6_556 5 ? 
S Ag' Ag 100.8(3) 6_546 5 ? 
I2 Ag' Ag 64.2(3) 1_554 5 ? 
Br2 Ag' Ag 64.2(3) 1_554 5 ? 
Br1 Ag' Ag 164.7(4) . 5 ? 
I2 Ag' Ag 40.3(3) 5_556 5 ? 
Br2 Ag' Ag 40.3(3) 5_556 5 ? 
Ag Ag' Ag 114.8(5) 2 5 ? 
Hg1 Ag' Ag 82.8(2) 5_556 5 ? 
Hg1 Ag' Ag 82.8(2) 5_566 5 ? 
Ag' Ag' Ag 3.8(5) 5 5 ? 
Hg2 Ag' Ag 134.82(19) . 5 ? 
Hg2 Ag' Ag 134.82(19) 1_545 5 ? 
Ag' Ag' Ag 109.27(10) 2 5 ? 
Ag Ag' I1 91(4) . 5_556 ? 
S Ag' I1 67.3(4) 6_556 5_556 ? 
S Ag' I1 67.3(4) 6_546 5_556 ? 
I2 Ag' I1 177.2(5) 1_554 5_556 ? 
Br2 Ag' I1 177.2(5) 1_554 5_556 ? 
Br1 Ag' I1 76.7(3) . 5_556 ? 
I2 Ag' I1 78.3(4) 5_556 5_556 ? 
Br2 Ag' I1 78.3(4) 5_556 5_556 ? 
Ag Ag' I1 126.6(5) 2 5_556 ? 
Hg1 Ag' I1 50.9(2) 5_556 5_556 ? 
Hg1 Ag' I1 50.9(2) 5_566 5_556 ? 
Ag' Ag' I1 122.4(7) 5 5_556 ? 
Hg2 Ag' I1 47.4(2) . 5_556 ? 
Hg2 Ag' I1 47.4(2) 1_545 5_556 ? 
Ag' Ag' I1 132.15(18) 2 5_556 ? 
Ag Ag' I1 118.6(2) 5 5_556 ? 
Ag Ag' Br1 91(4) . 5_556 ? 
S Ag' Br1 67.3(4) 6_556 5_556 ? 
S Ag' Br1 67.3(4) 6_546 5_556 ? 
I2 Ag' Br1 177.2(5) 1_554 5_556 ? 
Br2 Ag' Br1 177.2(5) 1_554 5_556 ? 
Br1 Ag' Br1 76.7(3) . 5_556 ? 
I2 Ag' Br1 78.3(4) 5_556 5_556 ? 
Br2 Ag' Br1 78.3(4) 5_556 5_556 ? 
Ag Ag' Br1 126.6(5) 2 5_556 ? 
Hg1 Ag' Br1 50.9(2) 5_556 5_556 ? 
Hg1 Ag' Br1 50.9(2) 5_566 5_556 ? 
Ag' Ag' Br1 122.4(7) 5 5_556 ? 
Hg2 Ag' Br1 47.4(2) . 5_556 ? 
Hg2 Ag' Br1 47.4(2) 1_545 5_556 ? 
Ag' Ag' Br1 132.15(18) 2 5_556 ? 
Ag Ag' Br1 118.6(2) 5 5_556 ? 
I1 Ag' Br1 0.0 5_556 5_556 ? 
Ag Ag' Ag' 90.000(1) . 1_565 ? 
S Ag' Ag' 22.7(4) 6_556 1_565 ? 
S Ag' Ag' 157.3(4) 6_546 1_565 ? 
I2 Ag' Ag' 90.0 1_554 1_565 ? 
Br2 Ag' Ag' 90.0 1_554 1_565 ? 
Br1 Ag' Ag' 90.0 . 1_565 ? 
I2 Ag' Ag' 90.0 5_556 1_565 ? 
Br2 Ag' Ag' 90.0 5_556 1_565 ? 
Ag Ag' Ag' 90.0 2 1_565 ? 
Hg1 Ag' Ag' 127.17(16) 5_556 1_565 ? 
Hg1 Ag' Ag' 52.83(16) 5_566 1_565 ? 
Ag' Ag' Ag' 90.0 5 1_565 ? 
Hg2 Ag' Ag' 53.55(15) . 1_565 ? 
Hg2 Ag' Ag' 126.45(15) 1_545 1_565 ? 
Ag' Ag' Ag' 90.0 2 1_565 ? 
Ag Ag' Ag' 90.0 5 1_565 ? 
I1 Ag' Ag' 90.0 5_556 1_565 ? 
Br1 Ag' Ag' 90.0 5_556 1_565 ? 
Ag Br1 Ag 64.1(7) . 2 ? 
Ag Br1 Hg2 116.4(2) . 2_565 ? 
Ag Br1 Hg2 70.7(2) 2 2_565 ? 
Ag Br1 Hg2 70.7(2) . 1_545 ? 
Ag Br1 Hg2 116.4(2) 2 1_545 ? 
Hg2 Br1 Hg2 172.28(7) 2_565 1_545 ? 
Ag Br1 Hg2 116.4(2) . 2 ? 
Ag Br1 Hg2 70.7(2) 2 2 ? 
Hg2 Br1 Hg2 85.661(7) 2_565 2 ? 
Hg2 Br1 Hg2 93.819(7) 1_545 2 ? 
Ag Br1 Hg2 70.7(2) . . ? 
Ag Br1 Hg2 116.4(2) 2 . ? 
Hg2 Br1 Hg2 93.819(7) 2_565 . ? 
Hg2 Br1 Hg2 85.661(7) 1_545 . ? 
Hg2 Br1 Hg2 172.28(7) 2 . ? 
Ag Br1 Ag' 2.5(7) . . ? 
Ag Br1 Ag' 66.59(12) 2 . ? 
Hg2 Br1 Ag' 118.0(2) 2_565 . ? 
Hg2 Br1 Ag' 69.0(2) 1_545 . ? 
Hg2 Br1 Ag' 118.0(2) 2 . ? 
Hg2 Br1 Ag' 69.0(2) . . ? 
Ag Br1 Ag' 66.59(12) . 2 ? 
Ag Br1 Ag' 2.5(7) 2 2 ? 
Hg2 Br1 Ag' 69.0(2) 2_565 2 ? 
Hg2 Br1 Ag' 118.0(2) 1_545 2 ? 
Hg2 Br1 Ag' 69.0(2) 2 2 ? 
Hg2 Br1 Ag' 118.0(2) . 2 ? 
Ag' Br1 Ag' 69.1(6) . 2 ? 
Ag Br1 Hg1 130.63(19) . . ? 
Ag Br1 Hg1 130.63(19) 2 . ? 
Hg2 Br1 Hg1 60.870(19) 2_565 . ? 
Hg2 Br1 Hg1 112.54(4) 1_545 . ? 
Hg2 Br1 Hg1 112.54(4) 2 . ? 
Hg2 Br1 Hg1 60.870(19) . . ? 
Ag' Br1 Hg1 129.27(18) . . ? 
Ag' Br1 Hg1 129.27(18) 2 . ? 
Ag Br1 Hg1 130.63(19) . 1_545 ? 
Ag Br1 Hg1 130.63(19) 2 1_545 ? 
Hg2 Br1 Hg1 112.54(4) 2_565 1_545 ? 
Hg2 Br1 Hg1 60.870(19) 1_545 1_545 ? 
Hg2 Br1 Hg1 60.870(19) 2 1_545 ? 
Hg2 Br1 Hg1 112.54(4) . 1_545 ? 
Ag' Br1 Hg1 129.27(18) . 1_545 ? 
Ag' Br1 Hg1 129.27(18) 2 1_545 ? 
Hg1 Br1 Hg1 79.58(5) . 1_545 ? 
Ag Br1 Ag' 169.9(4) . 6_656 ? 
Ag Br1 Ag' 105.8(4) 2 6_656 ? 
Hg2 Br1 Ag' 57.32(11) 2_565 6_656 ? 
Hg2 Br1 Ag' 116.11(12) 1_545 6_656 ? 
Hg2 Br1 Ag' 57.32(11) 2 6_656 ? 
Hg2 Br1 Ag' 116.11(12) . 6_656 ? 
Ag' Br1 Ag' 172.4(4) . 6_656 ? 
Ag' Br1 Ag' 103.3(3) 2 6_656 ? 
Hg1 Br1 Ag' 55.27(11) . 6_656 ? 
Hg1 Br1 Ag' 55.27(11) 1_545 6_656 ? 
Ag Br1 Ag' 105.8(4) . 5_556 ? 
Ag Br1 Ag' 169.9(4) 2 5_556 ? 
Hg2 Br1 Ag' 116.11(12) 2_565 5_556 ? 
Hg2 Br1 Ag' 57.32(11) 1_545 5_556 ? 
Hg2 Br1 Ag' 116.11(12) 2 5_556 ? 
Hg2 Br1 Ag' 57.32(11) . 5_556 ? 
Ag' Br1 Ag' 103.3(3) . 5_556 ? 
Ag' Br1 Ag' 172.4(4) 2 5_556 ? 
Hg1 Br1 Ag' 55.27(11) . 5_556 ? 
Hg1 Br1 Ag' 55.27(11) 1_545 5_556 ? 
Ag' Br1 Ag' 84.3(4) 6_656 5_556 ? 
Ag' Br2 Ag' 89.9(6) 2_556 1_556 ? 
Ag' Br2 Ag 10.7(5) 2_556 2_556 ? 
Ag' Br2 Ag 79.3(3) 1_556 2_556 ? 
Ag' Br2 Ag 79.2(3) 2_556 1_556 ? 
Ag' Br2 Ag 10.7(5) 1_556 1_556 ? 
Ag Br2 Ag 68.6(5) 2_556 1_556 ? 
Ag' Br2 Hg1 119.97(16) 2_556 1_545 ? 
Ag' Br2 Hg1 119.97(16) 1_556 1_545 ? 
Ag Br2 Hg1 125.69(13) 2_556 1_545 ? 
Ag Br2 Hg1 125.69(13) 1_556 1_545 ? 
Ag' Br2 Hg1 119.97(16) 2_556 . ? 
Ag' Br2 Hg1 119.97(16) 1_556 . ? 
Ag Br2 Hg1 125.69(13) 2_556 . ? 
Ag Br2 Hg1 125.69(13) 1_556 . ? 
Hg1 Br2 Hg1 90.17(5) 1_545 . ? 
Ag' Br2 Ag' 165.4(4) 2_556 5_556 ? 
Ag' Br2 Ag' 75.5(4) 1_556 5_556 ? 
Ag Br2 Ag' 154.8(3) 2_556 5_556 ? 
Ag Br2 Ag' 86.2(5) 1_556 5_556 ? 
Hg1 Br2 Ag' 69.0(2) 1_545 5_556 ? 
Hg1 Br2 Ag' 69.0(2) . 5_556 ? 
Ag' Br2 Ag' 75.5(4) 2_556 6_656 ? 
Ag' Br2 Ag' 165.4(4) 1_556 6_656 ? 
Ag Br2 Ag' 86.2(5) 2_556 6_656 ? 
Ag Br2 Ag' 154.8(3) 1_556 6_656 ? 
Hg1 Br2 Ag' 69.0(2) 1_545 6_656 ? 
Hg1 Br2 Ag' 69.0(2) . 6_656 ? 
Ag' Br2 Ag' 119.1(6) 5_556 6_656 ? 
Ag' Br2 Ag 166.8(4) 2_556 5_556 ? 
Ag' Br2 Ag 76.9(4) 1_556 5_556 ? 
Ag Br2 Ag 156.1(4) 2_556 5_556 ? 
Ag Br2 Ag 87.6(3) 1_556 5_556 ? 
Hg1 Br2 Ag 68.12(16) 1_545 5_556 ? 
Hg1 Br2 Ag 68.12(16) . 5_556 ? 
Ag' Br2 Ag 1.4(5) 5_556 5_556 ? 
Ag' Br2 Ag 117.67(12) 6_656 5_556 ? 
Ag' Br2 Ag 76.9(4) 2_556 6_656 ? 
Ag' Br2 Ag 166.8(4) 1_556 6_656 ? 
Ag Br2 Ag 87.6(3) 2_556 6_656 ? 
Ag Br2 Ag 156.1(4) 1_556 6_656 ? 
Hg1 Br2 Ag 68.12(16) 1_545 6_656 ? 
Hg1 Br2 Ag 68.12(16) . 6_656 ? 
Ag' Br2 Ag 117.67(12) 5_556 6_656 ? 
Ag' Br2 Ag 1.4(5) 6_656 6_656 ? 
Ag Br2 Ag 116.3(5) 5_556 6_656 ? 
Ag' Br2 Ag' 58.97(18) 2_556 2_566 ? 
Ag' Br2 Ag' 90.0(3) 1_556 2_566 ? 
Ag Br2 Ag' 59.56(17) 2_556 2_566 ? 
Ag Br2 Ag' 84.48(15) 1_556 2_566 ? 
Hg1 Br2 Ag' 149.81(15) 1_545 2_566 ? 
Hg1 Br2 Ag' 69.56(16) . 2_566 ? 
Ag' Br2 Ag' 119.9(2) 5_556 2_566 ? 
Ag' Br2 Ag' 82.6(2) 6_656 2_566 ? 
Ag Br2 Ag' 120.13(15) 5_556 2_566 ? 
Ag Br2 Ag' 83.3(2) 6_656 2_566 ? 
Ag' Br2 Ag' 90.0(3) 2_556 1_546 ? 
Ag' Br2 Ag' 58.97(18) 1_556 1_546 ? 
Ag Br2 Ag' 84.48(15) 2_556 1_546 ? 
Ag Br2 Ag' 59.56(17) 1_556 1_546 ? 
Hg1 Br2 Ag' 69.56(16) 1_545 1_546 ? 
Hg1 Br2 Ag' 149.81(15) . 1_546 ? 
Ag' Br2 Ag' 82.6(2) 5_556 1_546 ? 
Ag' Br2 Ag' 119.9(2) 6_656 1_546 ? 
Ag Br2 Ag' 83.3(2) 5_556 1_546 ? 
Ag Br2 Ag' 120.13(15) 6_656 1_546 ? 
Ag' Br2 Ag' 137.2(3) 2_566 1_546 ? 
Hg1 S Hg2 97.40(18) . 2_565 ? 
Hg1 S Ag' 103.5(4) . 6_666 ? 
Hg2 S Ag' 105.9(4) 2_565 6_666 ? 
Hg1 S Ag' 103.5(4) . 6_656 ? 
Hg2 S Ag' 105.9(4) 2_565 6_656 ? 
Ag' S Ag' 134.7(8) 6_666 6_656 ? 
Hg1 S Ag 113.0(3) . 6_666 ? 
Hg2 S Ag 97.3(3) 2_565 6_666 ? 
Ag' S Ag 11.7(5) 6_666 6_666 ? 
Ag' S Ag 133.4(2) 6_656 6_666 ? 
Hg1 S Ag 113.0(3) . 6_656 ? 
Hg2 S Ag 97.3(3) 2_565 6_656 ? 
Ag' S Ag 133.4(2) 6_666 6_656 ? 
Ag' S Ag 11.7(5) 6_656 6_656 ? 
Ag S Ag 129.1(8) 6_666 6_656 ? 
Hg1 S Ag 149.74(13) . 5_666 ? 
Hg2 S Ag 91.9(2) 2_565 5_666 ? 
Ag' S Ag 46.3(3) 6_666 5_666 ? 
Ag' S Ag 101.5(5) 6_656 5_666 ? 
Ag S Ag 37.0(4) 6_666 5_666 ? 
Ag S Ag 94.1(3) 6_656 5_666 ? 
Hg1 S Ag 149.74(14) . 5_656 ? 
Hg2 S Ag 91.9(2) 2_565 5_656 ? 
Ag' S Ag 101.5(5) 6_666 5_656 ? 
Ag' S Ag 46.3(3) 6_656 5_656 ? 
Ag S Ag 94.1(3) 6_666 5_656 ? 
Ag S Ag 37.0(4) 6_656 5_656 ? 
Ag S Ag 57.67(19) 5_666 5_656 ? 
Hg1 S Ag' 81.6(2) . 2_566 ? 
Hg2 S Ag' 152.60(9) 2_565 2_566 ? 
Ag' S Ag' 48.8(4) 6_666 2_566 ? 
Ag' S Ag' 100.9(3) 6_656 2_566 ? 
Ag S Ag' 59.0(3) 6_666 2_566 ? 
Ag S Ag' 108.4(4) 6_656 2_566 ? 
Ag S Ag' 77.1(3) 5_666 2_566 ? 
Ag S Ag' 102.7(3) 5_656 2_566 ? 
Hg1 S Ag' 81.6(2) . 2_556 ? 
Hg2 S Ag' 152.60(9) 2_565 2_556 ? 
Ag' S Ag' 100.9(3) 6_666 2_556 ? 
Ag' S Ag' 48.8(4) 6_656 2_556 ? 
Ag S Ag' 108.4(4) 6_666 2_556 ? 
Ag S Ag' 59.0(3) 6_656 2_556 ? 
Ag S Ag' 102.7(3) 5_666 2_556 ? 
Ag S Ag' 77.1(3) 5_656 2_556 ? 
Ag' S Ag' 54.66(17) 2_566 2_556 ? 
Hg1 S Ag' 150.50(15) . 5_666 ? 
Hg2 S Ag' 95.4(2) 2_565 5_666 ? 
Ag' S Ag' 47.3(5) 6_666 5_666 ? 
Ag' S Ag' 98.4(4) 6_656 5_666 ? 
Ag S Ag' 38.7(3) 6_666 5_666 ? 
Ag S Ag' 91.5(4) 6_656 5_666 ? 
Ag S Ag' 4.1(3) 5_666 5_666 ? 
Ag S Ag' 55.49(8) 5_656 5_666 ? 
Ag' S Ag' 74.96(18) 2_566 5_666 ? 
Ag' S Ag' 98.7(2) 2_556 5_666 ? 
Hg1 S Ag' 150.50(15) . 5_656 ? 
Hg2 S Ag' 95.4(2) 2_565 5_656 ? 
Ag' S Ag' 98.4(4) 6_666 5_656 ? 
Ag' S Ag' 47.3(5) 6_656 5_656 ? 
Ag S Ag' 91.5(4) 6_666 5_656 ? 
Ag S Ag' 38.7(3) 6_656 5_656 ? 
Ag S Ag' 55.49(8) 5_666 5_656 ? 
Ag S Ag' 4.1(3) 5_656 5_656 ? 
Ag' S Ag' 98.7(2) 2_566 5_656 ? 
Ag' S Ag' 74.96(18) 2_556 5_656 ? 
Ag' S Ag' 53.07(17) 5_666 5_656 ? 
 
_diffrn_measured_fraction_theta_max    0.996 
_diffrn_reflns_theta_full              28.28 
_diffrn_measured_fraction_theta_full   0.996 
_refine_diff_density_max    3.009 
_refine_diff_density_min   -2.282 
_refine_diff_density_rms    0.350 
