# Supplementary material
Source: MDPI journal article supplement (https://www.mdpi.com/2073-4352/13/8/1218)
Supplement: s1 [file s1 › hanauerite_Schone_Aussicht_Supplement 1.CIF]

 
data_hanauerite_Schone_Aussicht 
 
_audit_creation_method            SHELXL-97 
_chemical_name_systematic 
; 
 ? 
; 
_chemical_name_common             ? 
_chemical_melting_point           ? 
_chemical_formula_moiety          ? 
_chemical_formula_sum 
 'Ag Br0.25 Hg I0.75 S' 
_chemical_formula_weight          455.67 
 
loop_ 
 _atom_type_symbol 
 _atom_type_description 
 _atom_type_scat_dispersion_real 
 _atom_type_scat_dispersion_imag 
 _atom_type_scat_source 
 'Ag'  'Ag'  -0.8971   1.1015 
 'International Tables Vol C Tables 4.2.6.8 and 6.1.1.4' 
 'Hg'  'Hg'  -2.3894   9.2266 
 'International Tables Vol C Tables 4.2.6.8 and 6.1.1.4' 
 'I'  'I'  -0.4742   1.8119 
 'International Tables Vol C Tables 4.2.6.8 and 6.1.1.4' 
 'S'  'S'   0.1246   0.1234 
 'International Tables Vol C Tables 4.2.6.8 and 6.1.1.4' 
 'Br'  'Br'  -0.2901   2.4595 
 'International Tables Vol C Tables 4.2.6.8 and 6.1.1.4' 
 
_symmetry_cell_setting            'orthorhombic' 
_symmetry_space_group_name_H-M    'P m m a' 
 
loop_ 
 _symmetry_equiv_pos_as_xyz 
 'x, y, z' 
 '-x+1/2, -y, z' 
 '-x, y, -z' 
 'x+1/2, -y, -z' 
 '-x, -y, -z' 
 'x-1/2, y, -z' 
 'x, -y, z' 
 '-x-1/2, y, z' 
 
_cell_length_a                    9.932(4) 
_cell_length_b                    4.6219(19) 
_cell_length_c                    9.891(4) 
_cell_angle_alpha                 90.00 
_cell_angle_beta                  90.00 
_cell_angle_gamma                 90.00 
_cell_volume                      454.0(3) 
_cell_formula_units_Z             4 
_cell_measurement_temperature     293(2) 
_cell_measurement_reflns_used     2596
_cell_measurement_theta_min       2.1020 
_cell_measurement_theta_max       35.9910 
 
_exptl_crystal_description        'prismatic' 
_exptl_crystal_colour             'black' 
_exptl_crystal_size_max           0.15 
_exptl_crystal_size_mid           0.01  
_exptl_crystal_size_min           0.01 
_exptl_crystal_density_meas       ? 
_exptl_crystal_density_diffrn     6.666 
_exptl_crystal_density_method     'not measured' 
_exptl_crystal_F_000              766 
_exptl_absorpt_coefficient_mu     45.625 
_exptl_absorpt_correction_type    ?  
_exptl_absorpt_correction_T_min   ?  
_exptl_absorpt_correction_T_max   ?  
_exptl_absorpt_process_details    ? 
 
_exptl_special_details 
; 
 ? 
; 
 
_diffrn_ambient_temperature       293(2) 
_diffrn_radiation_wavelength      0.71073 
_diffrn_radiation_type            MoK\a 
_diffrn_radiation_source          'fine-focus sealed tube' 
_diffrn_radiation_monochromator   graphite 
_diffrn_measurement_device_type   'Bruker APEX-II CCD'   
_diffrn_measurement_method        '\w and \f scans' 
_diffrn_detector_area_resol_mean  16.0630 
_diffrn_standards_number          ? 
_diffrn_standards_interval_count  ? 
_diffrn_standards_interval_time   ? 
_diffrn_standards_decay_%         ? 
_diffrn_reflns_number             4037 
_diffrn_reflns_av_R_equivalents   0.0992 
_diffrn_reflns_av_sigmaI/netI     0.0381 
_diffrn_reflns_limit_h_min        -11 
_diffrn_reflns_limit_h_max        13 
_diffrn_reflns_limit_k_min        -6 
_diffrn_reflns_limit_k_max        6 
_diffrn_reflns_limit_l_min        -13 
_diffrn_reflns_limit_l_max        6 
_diffrn_reflns_theta_min          2.91 
_diffrn_reflns_theta_max          28.28 
_reflns_number_total              666 
_reflns_number_gt                 607 
_reflns_threshold_expression      >2sigma(I) 
 
_computing_data_collection        ? 
_computing_cell_refinement        ? 
_computing_data_reduction         ? 
_computing_structure_solution     'SHELXS-97 (Sheldrick, 1990)' 
_computing_structure_refinement   'SHELXL-97 (Sheldrick, 1997)' 
_computing_molecular_graphics     ? 
_computing_publication_material   ? 
 
_refine_special_details 
; 
 Refinement of F^2^ against ALL reflections.  The weighted R-factor wR and 
 goodness of fit S are based on F^2^, conventional R-factors R are based 
 on F, with F set to zero for negative F^2^. The threshold expression of 
 F^2^ > 2sigma(F^2^) is used only for calculating R-factors(gt) etc. and is 
 not relevant to the choice of reflections for refinement.  R-factors based 
 on F^2^ are statistically about twice as large as those based on F, and R- 
 factors based on ALL data will be even larger. 
; 
 
_refine_ls_structure_factor_coef  Fsqd  
_refine_ls_matrix_type            full 
_refine_ls_weighting_scheme       calc  
_refine_ls_weighting_details 
 'calc w=1/[\s^2^(Fo^2^)+(0.0530P)^2^+4.5383P] where P=(Fo^2^+2Fc^2^)/3' 
_atom_sites_solution_primary      direct 
_atom_sites_solution_secondary    difmap 
_atom_sites_solution_hydrogens    none 
_refine_ls_hydrogen_treatment     none
_refine_ls_extinction_method      none 
_refine_ls_extinction_coef        ? 
_refine_ls_number_reflns          666 
_refine_ls_number_parameters      35 
_refine_ls_number_restraints      1 
_refine_ls_R_factor_all           0.0469 
_refine_ls_R_factor_gt            0.0416 
_refine_ls_wR_factor_ref          0.1068 
_refine_ls_wR_factor_gt           0.1040 
_refine_ls_goodness_of_fit_ref    1.142 
_refine_ls_restrained_S_all       1.141 
_refine_ls_shift/su_max           0.000 
_refine_ls_shift/su_mean          0.000 
 
loop_ 
 _atom_site_label 
 _atom_site_type_symbol 
 _atom_site_fract_x 
 _atom_site_fract_y 
 _atom_site_fract_z 
 _atom_site_U_iso_or_equiv 
 _atom_site_adp_type 
 _atom_site_occupancy 
 _atom_site_symmetry_multiplicity 
 _atom_site_calc_flag 
 _atom_site_refinement_flags 
 _atom_site_disorder_assembly 
 _atom_site_disorder_group 
Hg1 Hg 0.2500 0.5000 0.75732(10) 0.0413(3) Uani 1 4 d S . . 
Hg2 Hg 0.0000 0.5000 0.5000 0.0421(3) Uani 1 4 d S . . 
Ag' Ag 0.0827(5) 0.0000 0.2196(5) 0.0651(12) Uani 0.744(11) 2 d SP . . 
Ag'' Ag 0.0388(14) 0.0000 0.1644(15) 0.0651(12) Uani 0.256(11) 2 d SP . . 
Br1 Br 0.2500 0.0000 0.47676(17) 0.0324(6) Uani 0.43(2) 4 d SP . . 
I1 I 0.2500 0.0000 0.47676(17) 0.0324(6) Uani 0.57(2) 4 d SP . . 
Br2 Br 0.2500 0.0000 0.99018(13) 0.0349(5) Uani 0.06(2) 4 d SP . . 
I2 I 0.2500 0.0000 0.99018(13) 0.0349(5) Uani 0.94(2) 4 d SP . . 
S S 0.4881(4) 0.5000 0.7386(4) 0.0285(7) Uani 1 2 d S . . 
 
loop_ 
 _atom_site_aniso_label 
 _atom_site_aniso_U_11 
 _atom_site_aniso_U_22 
 _atom_site_aniso_U_33 
 _atom_site_aniso_U_23 
 _atom_site_aniso_U_13 
 _atom_site_aniso_U_12 
Hg1 0.0337(5) 0.0408(5) 0.0493(5) 0.000 0.000 0.000 
Hg2 0.0521(6) 0.0404(5) 0.0337(4) 0.000 -0.0064(4) 0.000 
Ag' 0.090(3) 0.0332(8) 0.072(2) 0.000 0.035(2) 0.000 
Ag'' 0.090(3) 0.0332(8) 0.072(2) 0.000 0.035(2) 0.000 
Br1 0.0325(8) 0.0233(7) 0.0414(9) 0.000 0.000 0.000 
I1 0.0325(8) 0.0233(7) 0.0414(9) 0.000 0.000 0.000 
Br2 0.0432(9) 0.0344(7) 0.0271(7) 0.000 0.000 0.000 
I2 0.0432(9) 0.0344(7) 0.0271(7) 0.000 0.000 0.000 
S 0.0320(17) 0.0231(14) 0.0304(15) 0.000 -0.0007(13) 0.000 
 
_geom_special_details 
; 
 All esds (except the esd in the dihedral angle between two l.s. planes) 
 are estimated using the full covariance matrix.  The cell esds are taken 
 into account individually in the estimation of esds in distances, angles 
 and torsion angles; correlations between esds in cell parameters are only 
 used when they are defined by crystal symmetry.  An approximate (isotropic) 
 treatment of cell esds is used for estimating esds involving l.s. planes. 
; 
 
loop_ 
 _geom_bond_atom_site_label_1 
 _geom_bond_atom_site_label_2 
 _geom_bond_distance 
 _geom_bond_site_symmetry_2 
 _geom_bond_publ_flag 
Hg1 S 2.372(4) 2_565 ? 
Hg1 S 2.372(4) . ? 
Hg1 I2 3.2627(15) 1_565 ? 
Hg1 Br2 3.2627(15) 1_565 ? 
Hg1 Br2 3.2627(15) . ? 
Hg1 Hg2 3.5558(12) . ? 
Hg1 Hg2 3.5558(12) 2_565 ? 
Hg1 Br1 3.6113(19) . ? 
Hg1 I1 3.6113(19) 1_565 ? 
Hg1 Br1 3.6113(19) 1_565 ? 
Hg1 Ag'' 3.764(10) 6_666 ? 
Hg1 Ag'' 3.764(10) 5_556 ? 
Hg1 Ag'' 3.764(10) 6_656 ? 
Hg1 Ag'' 3.764(10) 5_566 ? 
Hg1 Ag' 4.039(4) 6_666 ? 
Hg1 Ag' 4.039(4) 5_556 ? 
Hg1 Ag' 4.039(4) 6_656 ? 
Hg1 Ag' 4.039(4) 5_566 ? 
Hg2 S 2.363(4) 6_556 ? 
Hg2 S 2.363(4) 2_565 ? 
Hg2 I1 3.3998(10) 5_556 ? 
Hg2 I1 3.3998(10) 1_565 ? 
Hg2 Br1 3.3998(10) 5_556 ? 
Hg2 Br1 3.3998(10) 1_565 ? 
Hg2 Br1 3.3998(10) . ? 
Hg2 I1 3.3998(10) 5_566 ? 
Hg2 Br1 3.3998(10) 5_566 ? 
Hg2 Hg1 3.5558(12) 5_566 ? 
Hg2 Ag' 3.702(3) . ? 
Hg2 Ag' 3.702(3) 5_566 ? 
Hg2 Ag' 3.702(3) 5_556 ? 
Hg2 Ag' 3.702(3) 1_565 ? 
Hg2 Ag'' 4.063(11) . ? 
Hg2 Ag'' 4.063(11) 5_566 ? 
Hg2 Ag'' 4.063(11) 5_556 ? 
Hg2 Ag'' 4.063(11) 1_565 ? 
Ag' Ag'' 0.699(13) . ? 
Ag' S 2.529(2) 6_546 ? 
Ag' S 2.529(2) 6_556 ? 
Ag' I2 2.813(3) 1_554 ? 
Ag' Br2 2.813(3) 1_554 ? 
Ag' Br1 3.038(7) . ? 
Ag' Ag' 3.323(10) 2 ? 
Ag' Hg2 3.702(3) 1_545 ? 
Ag' Ag'' 3.799(17) 2 ? 
Ag' I2 3.902(7) 5_556 ? 
Ag' Br2 3.902(7) 5_556 ? 
Ag' Ag'' 3.99(2) 5 ? 
Ag' Hg1 4.039(4) 5_556 ? 
Ag' Hg1 4.039(4) 5_566 ? 
Ag' I1 4.465(3) 5_556 ? 
Ag' Br1 4.465(3) 5_556 ? 
Ag' Ag' 4.6219(19) 1_565 ? 
Ag' Ag' 4.6219(19) 1_545 ? 
Ag'' S 2.552(5) 6_556 ? 
Ag'' S 2.552(5) 6_546 ? 
Ag'' I2 2.715(10) 1_554 ? 
Ag'' Br2 2.715(10) 1_554 ? 
Ag'' I2 3.250(17) 5_556 ? 
Ag'' Br2 3.250(17) 5_556 ? 
Ag'' Ag'' 3.34(3) 5 ? 
Ag'' Br1 3.734(18) . ? 
Ag'' Hg1 3.764(10) 5_556 ? 
Ag'' Hg1 3.764(10) 5_566 ? 
Ag'' Ag' 3.799(17) 2 ? 
Ag'' Ag' 3.99(2) 5 ? 
Ag'' Hg2 4.063(11) 1_545 ? 
Ag'' Ag'' 4.20(3) 2 ? 
Ag'' I1 4.563(10) 5_556 ? 
Ag'' Br1 4.563(10) 5_556 ? 
Ag'' Ag'' 4.6219(19) 1_565 ? 
Br1 Ag' 3.038(7) 2 ? 
Br1 Hg2 3.3998(10) 2_565 ? 
Br1 Hg2 3.3998(10) 1_545 ? 
Br1 Hg2 3.3998(10) 2 ? 
Br1 Hg1 3.6113(19) 1_545 ? 
Br1 Ag'' 3.734(18) 2 ? 
Br1 Ag' 4.465(3) 6_656 ? 
Br1 Ag' 4.465(3) 5_556 ? 
Br2 Ag'' 2.715(10) 2_556 ? 
Br2 Ag'' 2.715(10) 1_556 ? 
Br2 Ag' 2.813(3) 2_556 ? 
Br2 Ag' 2.813(3) 1_556 ? 
Br2 Ag'' 3.250(17) 5_556 ? 
Br2 Ag'' 3.250(17) 6_656 ? 
Br2 Hg1 3.2627(15) 1_545 ? 
Br2 Ag' 3.902(7) 5_556 ? 
Br2 Ag' 3.902(7) 6_656 ? 
Br2 Ag'' 5.360(5) 2_566 ? 
Br2 Ag'' 5.360(5) 1_546 ? 
S Hg2 2.363(4) 2_565 ? 
S Ag' 2.529(2) 6_666 ? 
S Ag' 2.529(2) 6_656 ? 
S Ag'' 2.552(5) 6_666 ? 
S Ag'' 2.552(5) 6_656 ? 
S Ag'' 4.812(14) 2_566 ? 
S Ag'' 4.812(14) 2_556 ? 
S Ag' 4.866(6) 5_666 ? 
S Ag' 4.866(6) 5_656 ? 
S Hg2 5.191(2) 2 ? 
S Hg2 5.191(2) 2_575 ? 
 
loop_ 
 _geom_angle_atom_site_label_1 
 _geom_angle_atom_site_label_2 
 _geom_angle_atom_site_label_3 
 _geom_angle 
 _geom_angle_site_symmetry_1 
 _geom_angle_site_symmetry_3 
 _geom_angle_publ_flag 
S Hg1 S 171.05(18) 2_565 . ? 
S Hg1 I2 93.16(6) 2_565 1_565 ? 
S Hg1 I2 93.16(6) . 1_565 ? 
S Hg1 Br2 93.16(6) 2_565 1_565 ? 
S Hg1 Br2 93.16(6) . 1_565 ? 
I2 Hg1 Br2 0.00(3) 1_565 1_565 ? 
S Hg1 Br2 93.16(6) 2_565 . ? 
S Hg1 Br2 93.16(6) . . ? 
I2 Hg1 Br2 90.19(5) 1_565 . ? 
Br2 Hg1 Br2 90.19(5) 1_565 . ? 
S Hg1 Hg2 41.23(9) 2_565 . ? 
S Hg1 Hg2 129.81(10) . . ? 
I2 Hg1 Hg2 120.350(19) 1_565 . ? 
Br2 Hg1 Hg2 120.350(19) 1_565 . ? 
Br2 Hg1 Hg2 120.350(19) . . ? 
S Hg1 Hg2 129.81(10) 2_565 2_565 ? 
S Hg1 Hg2 41.23(9) . 2_565 ? 
I2 Hg1 Hg2 120.350(19) 1_565 2_565 ? 
Br2 Hg1 Hg2 120.350(19) 1_565 2_565 ? 
Br2 Hg1 Hg2 120.350(19) . 2_565 ? 
Hg2 Hg1 Hg2 88.58(4) . 2_565 ? 
S Hg1 Br1 86.56(7) 2_565 . ? 
S Hg1 Br1 86.56(7) . . ? 
I2 Hg1 Br1 174.69(3) 1_565 . ? 
Br2 Hg1 Br1 174.69(3) 1_565 . ? 
Br2 Hg1 Br1 95.12(4) . . ? 
Hg2 Hg1 Br1 56.63(2) . . ? 
Hg2 Hg1 Br1 56.63(2) 2_565 . ? 
S Hg1 I1 86.56(7) 2_565 1_565 ? 
S Hg1 I1 86.56(7) . 1_565 ? 
I2 Hg1 I1 95.12(4) 1_565 1_565 ? 
Br2 Hg1 I1 95.12(4) 1_565 1_565 ? 
Br2 Hg1 I1 174.69(3) . 1_565 ? 
Hg2 Hg1 I1 56.63(2) . 1_565 ? 
Hg2 Hg1 I1 56.63(2) 2_565 1_565 ? 
Br1 Hg1 I1 79.57(5) . 1_565 ? 
S Hg1 Br1 86.56(7) 2_565 1_565 ? 
S Hg1 Br1 86.56(7) . 1_565 ? 
I2 Hg1 Br1 95.12(4) 1_565 1_565 ? 
Br2 Hg1 Br1 95.12(4) 1_565 1_565 ? 
Br2 Hg1 Br1 174.69(3) . 1_565 ? 
Hg2 Hg1 Br1 56.63(2) . 1_565 ? 
Hg2 Hg1 Br1 56.63(2) 2_565 1_565 ? 
Br1 Hg1 Br1 79.57(5) . 1_565 ? 
I1 Hg1 Br1 0.00(3) 1_565 1_565 ? 
S Hg1 Ag'' 140.88(16) 2_565 6_666 ? 
S Hg1 Ag'' 42.0(2) . 6_666 ? 
I2 Hg1 Ag'' 54.5(2) 1_565 6_666 ? 
Br2 Hg1 Ag'' 54.5(2) 1_565 6_666 ? 
Br2 Hg1 Ag'' 106.84(16) . 6_666 ? 
Hg2 Hg1 Ag'' 132.79(16) . 6_666 ? 
Hg2 Hg1 Ag'' 67.4(3) 2_565 6_666 ? 
Br1 Hg1 Ag'' 123.4(3) . 6_666 ? 
I1 Hg1 Ag'' 76.42(17) 1_565 6_666 ? 
Br1 Hg1 Ag'' 76.42(17) 1_565 6_666 ? 
S Hg1 Ag'' 42.0(2) 2_565 5_556 ? 
S Hg1 Ag'' 140.88(16) . 5_556 ? 
I2 Hg1 Ag'' 106.84(16) 1_565 5_556 ? 
Br2 Hg1 Ag'' 106.84(16) 1_565 5_556 ? 
Br2 Hg1 Ag'' 54.5(2) . 5_556 ? 
Hg2 Hg1 Ag'' 67.4(3) . 5_556 ? 
Hg2 Hg1 Ag'' 132.79(16) 2_565 5_556 ? 
Br1 Hg1 Ag'' 76.42(17) . 5_556 ? 
I1 Hg1 Ag'' 123.4(3) 1_565 5_556 ? 
Br1 Hg1 Ag'' 123.4(3) 1_565 5_556 ? 
Ag'' Hg1 Ag'' 156.3(5) 6_666 5_556 ? 
S Hg1 Ag'' 140.88(16) 2_565 6_656 ? 
S Hg1 Ag'' 41.95(19) . 6_656 ? 
I2 Hg1 Ag'' 106.84(16) 1_565 6_656 ? 
Br2 Hg1 Ag'' 106.84(16) 1_565 6_656 ? 
Br2 Hg1 Ag'' 54.5(2) . 6_656 ? 
Hg2 Hg1 Ag'' 132.79(16) . 6_656 ? 
Hg2 Hg1 Ag'' 67.4(3) 2_565 6_656 ? 
Br1 Hg1 Ag'' 76.42(17) . 6_656 ? 
I1 Hg1 Ag'' 123.4(3) 1_565 6_656 ? 
Br1 Hg1 Ag'' 123.4(3) 1_565 6_656 ? 
Ag'' Hg1 Ag'' 75.8(2) 6_666 6_656 ? 
Ag'' Hg1 Ag'' 99.3(4) 5_556 6_656 ? 
S Hg1 Ag'' 42.0(2) 2_565 5_566 ? 
S Hg1 Ag'' 140.88(16) . 5_566 ? 
I2 Hg1 Ag'' 54.5(2) 1_565 5_566 ? 
Br2 Hg1 Ag'' 54.5(2) 1_565 5_566 ? 
Br2 Hg1 Ag'' 106.84(16) . 5_566 ? 
Hg2 Hg1 Ag'' 67.4(3) . 5_566 ? 
Hg2 Hg1 Ag'' 132.79(16) 2_565 5_566 ? 
Br1 Hg1 Ag'' 123.4(3) . 5_566 ? 
I1 Hg1 Ag'' 76.42(17) 1_565 5_566 ? 
Br1 Hg1 Ag'' 76.42(17) 1_565 5_566 ? 
Ag'' Hg1 Ag'' 99.3(4) 6_666 5_566 ? 
Ag'' Hg1 Ag'' 75.8(2) 5_556 5_566 ? 
Ag'' Hg1 Ag'' 156.3(5) 6_656 5_566 ? 
S Hg1 Ag' 145.09(4) 2_565 6_666 ? 
S Hg1 Ag' 35.78(6) . 6_666 ? 
I2 Hg1 Ag' 63.57(8) 1_565 6_666 ? 
Br2 Hg1 Ag' 63.57(8) 1_565 6_666 ? 
Br2 Hg1 Ag' 111.43(5) . 6_666 ? 
Hg2 Hg1 Ag' 127.72(6) . 6_666 ? 
Hg2 Hg1 Ag' 57.93(9) 2_565 6_666 ? 
Br1 Hg1 Ag' 114.18(9) . 6_666 ? 
I1 Hg1 Ag' 71.17(5) 1_565 6_666 ? 
Br1 Hg1 Ag' 71.17(5) 1_565 6_666 ? 
Ag'' Hg1 Ag' 9.45(19) 6_666 6_666 ? 
Ag'' Hg1 Ag' 164.4(3) 5_556 6_666 ? 
Ag'' Hg1 Ag' 73.51(15) 6_656 6_666 ? 
Ag'' Hg1 Ag' 105.10(19) 5_566 6_666 ? 
S Hg1 Ag' 35.78(6) 2_565 5_556 ? 
S Hg1 Ag' 145.09(4) . 5_556 ? 
I2 Hg1 Ag' 111.43(5) 1_565 5_556 ? 
Br2 Hg1 Ag' 111.43(5) 1_565 5_556 ? 
Br2 Hg1 Ag' 63.57(8) . 5_556 ? 
Hg2 Hg1 Ag' 57.93(9) . 5_556 ? 
Hg2 Hg1 Ag' 127.72(6) 2_565 5_556 ? 
Br1 Hg1 Ag' 71.17(5) . 5_556 ? 
I1 Hg1 Ag' 114.18(9) 1_565 5_556 ? 
Br1 Hg1 Ag' 114.18(9) 1_565 5_556 ? 
Ag'' Hg1 Ag' 164.4(3) 6_666 5_556 ? 
Ag'' Hg1 Ag' 9.45(19) 5_556 5_556 ? 
Ag'' Hg1 Ag' 105.10(19) 6_656 5_556 ? 
Ag'' Hg1 Ag' 73.51(15) 5_566 5_556 ? 
Ag' Hg1 Ag' 173.53(16) 6_666 5_556 ? 
S Hg1 Ag' 145.09(4) 2_565 6_656 ? 
S Hg1 Ag' 35.78(6) . 6_656 ? 
I2 Hg1 Ag' 111.43(5) 1_565 6_656 ? 
Br2 Hg1 Ag' 111.43(5) 1_565 6_656 ? 
Br2 Hg1 Ag' 63.57(8) . 6_656 ? 
Hg2 Hg1 Ag' 127.72(6) . 6_656 ? 
Hg2 Hg1 Ag' 57.93(9) 2_565 6_656 ? 
Br1 Hg1 Ag' 71.17(5) . 6_656 ? 
I1 Hg1 Ag' 114.18(9) 1_565 6_656 ? 
Br1 Hg1 Ag' 114.18(9) 1_565 6_656 ? 
Ag'' Hg1 Ag' 73.51(15) 6_666 6_656 ? 
Ag'' Hg1 Ag' 105.10(19) 5_556 6_656 ? 
Ag'' Hg1 Ag' 9.45(19) 6_656 6_656 ? 
Ag'' Hg1 Ag' 164.4(3) 5_566 6_656 ? 
Ag' Hg1 Ag' 69.81(8) 6_666 6_656 ? 
Ag' Hg1 Ag' 109.80(10) 5_556 6_656 ? 
S Hg1 Ag' 35.78(6) 2_565 5_566 ? 
S Hg1 Ag' 145.09(4) . 5_566 ? 
I2 Hg1 Ag' 63.57(8) 1_565 5_566 ? 
Br2 Hg1 Ag' 63.57(8) 1_565 5_566 ? 
Br2 Hg1 Ag' 111.43(5) . 5_566 ? 
Hg2 Hg1 Ag' 57.93(9) . 5_566 ? 
Hg2 Hg1 Ag' 127.72(6) 2_565 5_566 ? 
Br1 Hg1 Ag' 114.18(9) . 5_566 ? 
I1 Hg1 Ag' 71.17(5) 1_565 5_566 ? 
Br1 Hg1 Ag' 71.17(5) 1_565 5_566 ? 
Ag'' Hg1 Ag' 105.10(19) 6_666 5_566 ? 
Ag'' Hg1 Ag' 73.51(15) 5_556 5_566 ? 
Ag'' Hg1 Ag' 164.4(3) 6_656 5_566 ? 
Ag'' Hg1 Ag' 9.45(19) 5_566 5_566 ? 
Ag' Hg1 Ag' 109.80(10) 6_666 5_566 ? 
Ag' Hg1 Ag' 69.81(8) 5_556 5_566 ? 
Ag' Hg1 Ag' 173.53(16) 6_656 5_566 ? 
S Hg2 S 180.0 6_556 2_565 ? 
S Hg2 I1 91.78(7) 6_556 5_556 ? 
S Hg2 I1 88.22(7) 2_565 5_556 ? 
S Hg2 I1 88.22(7) 6_556 1_565 ? 
S Hg2 I1 91.78(7) 2_565 1_565 ? 
I1 Hg2 I1 180.00(6) 5_556 1_565 ? 
S Hg2 Br1 91.78(7) 6_556 5_556 ? 
S Hg2 Br1 88.22(7) 2_565 5_556 ? 
I1 Hg2 Br1 0.0 5_556 5_556 ? 
I1 Hg2 Br1 180.0 1_565 5_556 ? 
S Hg2 Br1 88.22(7) 6_556 1_565 ? 
S Hg2 Br1 91.78(7) 2_565 1_565 ? 
I1 Hg2 Br1 180.00(6) 5_556 1_565 ? 
I1 Hg2 Br1 0.00(6) 1_565 1_565 ? 
Br1 Hg2 Br1 180.00(6) 5_556 1_565 ? 
S Hg2 Br1 88.22(7) 6_556 . ? 
S Hg2 Br1 91.78(7) 2_565 . ? 
I1 Hg2 Br1 94.36(3) 5_556 . ? 
I1 Hg2 Br1 85.64(3) 1_565 . ? 
Br1 Hg2 Br1 94.36(3) 5_556 . ? 
Br1 Hg2 Br1 85.64(3) 1_565 . ? 
S Hg2 I1 91.78(7) 6_556 5_566 ? 
S Hg2 I1 88.22(7) 2_565 5_566 ? 
I1 Hg2 I1 85.64(3) 5_556 5_566 ? 
I1 Hg2 I1 94.36(3) 1_565 5_566 ? 
Br1 Hg2 I1 85.64(3) 5_556 5_566 ? 
Br1 Hg2 I1 94.36(3) 1_565 5_566 ? 
Br1 Hg2 I1 180.0 . 5_566 ? 
S Hg2 Br1 91.78(7) 6_556 5_566 ? 
S Hg2 Br1 88.22(7) 2_565 5_566 ? 
I1 Hg2 Br1 85.64(3) 5_556 5_566 ? 
I1 Hg2 Br1 94.36(3) 1_565 5_566 ? 
Br1 Hg2 Br1 85.64(3) 5_556 5_566 ? 
Br1 Hg2 Br1 94.36(3) 1_565 5_566 ? 
Br1 Hg2 Br1 180.0 . 5_566 ? 
I1 Hg2 Br1 0.0 5_566 5_566 ? 
S Hg2 Hg1 41.43(9) 6_556 5_566 ? 
S Hg2 Hg1 138.57(9) 2_565 5_566 ? 
I1 Hg2 Hg1 62.51(3) 5_556 5_566 ? 
I1 Hg2 Hg1 117.49(3) 1_565 5_566 ? 
Br1 Hg2 Hg1 62.51(3) 5_556 5_566 ? 
Br1 Hg2 Hg1 117.49(3) 1_565 5_566 ? 
Br1 Hg2 Hg1 117.49(3) . 5_566 ? 
I1 Hg2 Hg1 62.51(3) 5_566 5_566 ? 
Br1 Hg2 Hg1 62.51(3) 5_566 5_566 ? 
S Hg2 Hg1 138.57(9) 6_556 . ? 
S Hg2 Hg1 41.43(9) 2_565 . ? 
I1 Hg2 Hg1 117.49(3) 5_556 . ? 
I1 Hg2 Hg1 62.51(3) 1_565 . ? 
Br1 Hg2 Hg1 117.49(3) 5_556 . ? 
Br1 Hg2 Hg1 62.51(3) 1_565 . ? 
Br1 Hg2 Hg1 62.51(3) . . ? 
I1 Hg2 Hg1 117.49(3) 5_566 . ? 
Br1 Hg2 Hg1 117.49(3) 5_566 . ? 
Hg1 Hg2 Hg1 180.0 5_566 . ? 
S Hg2 Ag' 42.52(8) 6_556 . ? 
S Hg2 Ag' 137.48(8) 2_565 . ? 
I1 Hg2 Ag' 77.78(6) 5_556 . ? 
I1 Hg2 Ag' 102.22(6) 1_565 . ? 
Br1 Hg2 Ag' 77.78(6) 5_556 . ? 
Br1 Hg2 Ag' 102.22(6) 1_565 . ? 
Br1 Hg2 Ag' 50.43(10) . . ? 
I1 Hg2 Ag' 129.57(10) 5_566 . ? 
Br1 Hg2 Ag' 129.57(10) 5_566 . ? 
Hg1 Hg2 Ag' 67.59(10) 5_566 . ? 
Hg1 Hg2 Ag' 112.41(10) . . ? 
S Hg2 Ag' 137.48(8) 6_556 5_566 ? 
S Hg2 Ag' 42.52(8) 2_565 5_566 ? 
I1 Hg2 Ag' 102.22(6) 5_556 5_566 ? 
I1 Hg2 Ag' 77.78(6) 1_565 5_566 ? 
Br1 Hg2 Ag' 102.22(6) 5_556 5_566 ? 
Br1 Hg2 Ag' 77.78(6) 1_565 5_566 ? 
Br1 Hg2 Ag' 129.57(10) . 5_566 ? 
I1 Hg2 Ag' 50.43(10) 5_566 5_566 ? 
Br1 Hg2 Ag' 50.43(10) 5_566 5_566 ? 
Hg1 Hg2 Ag' 112.41(10) 5_566 5_566 ? 
Hg1 Hg2 Ag' 67.59(10) . 5_566 ? 
Ag' Hg2 Ag' 180.00(11) . 5_566 ? 
S Hg2 Ag' 137.48(8) 6_556 5_556 ? 
S Hg2 Ag' 42.52(8) 2_565 5_556 ? 
I1 Hg2 Ag' 50.43(10) 5_556 5_556 ? 
I1 Hg2 Ag' 129.57(10) 1_565 5_556 ? 
Br1 Hg2 Ag' 50.43(10) 5_556 5_556 ? 
Br1 Hg2 Ag' 129.57(10) 1_565 5_556 ? 
Br1 Hg2 Ag' 77.78(6) . 5_556 ? 
I1 Hg2 Ag' 102.22(6) 5_566 5_556 ? 
Br1 Hg2 Ag' 102.22(6) 5_566 5_556 ? 
Hg1 Hg2 Ag' 112.41(10) 5_566 5_556 ? 
Hg1 Hg2 Ag' 67.59(10) . 5_556 ? 
Ag' Hg2 Ag' 102.75(9) . 5_556 ? 
Ag' Hg2 Ag' 77.25(9) 5_566 5_556 ? 
S Hg2 Ag' 42.52(8) 6_556 1_565 ? 
S Hg2 Ag' 137.48(8) 2_565 1_565 ? 
I1 Hg2 Ag' 129.57(10) 5_556 1_565 ? 
I1 Hg2 Ag' 50.43(10) 1_565 1_565 ? 
Br1 Hg2 Ag' 129.57(10) 5_556 1_565 ? 
Br1 Hg2 Ag' 50.43(10) 1_565 1_565 ? 
Br1 Hg2 Ag' 102.22(6) . 1_565 ? 
I1 Hg2 Ag' 77.78(6) 5_566 1_565 ? 
Br1 Hg2 Ag' 77.78(6) 5_566 1_565 ? 
Hg1 Hg2 Ag' 67.59(10) 5_566 1_565 ? 
Hg1 Hg2 Ag' 112.41(10) . 1_565 ? 
Ag' Hg2 Ag' 77.25(9) . 1_565 ? 
Ag' Hg2 Ag' 102.75(9) 5_566 1_565 ? 
Ag' Hg2 Ag' 180.0 5_556 1_565 ? 
S Hg2 Ag'' 35.78(15) 6_556 . ? 
S Hg2 Ag'' 144.22(15) 2_565 . ? 
I1 Hg2 Ag'' 74.80(14) 5_556 . ? 
I1 Hg2 Ag'' 105.20(14) 1_565 . ? 
Br1 Hg2 Ag'' 74.80(14) 5_556 . ? 
Br1 Hg2 Ag'' 105.20(14) 1_565 . ? 
Br1 Hg2 Ag'' 59.3(2) . . ? 
I1 Hg2 Ag'' 120.7(2) 5_566 . ? 
Br1 Hg2 Ag'' 120.7(2) 5_566 . ? 
Hg1 Hg2 Ag'' 58.8(2) 5_566 . ? 
Hg1 Hg2 Ag'' 121.2(2) . . ? 
Ag' Hg2 Ag'' 8.85(17) . . ? 
Ag' Hg2 Ag'' 171.15(17) 5_566 . ? 
Ag' Hg2 Ag'' 106.14(14) 5_556 . ? 
Ag' Hg2 Ag'' 73.86(13) 1_565 . ? 
S Hg2 Ag'' 144.22(15) 6_556 5_566 ? 
S Hg2 Ag'' 35.78(15) 2_565 5_566 ? 
I1 Hg2 Ag'' 105.20(14) 5_556 5_566 ? 
I1 Hg2 Ag'' 74.80(14) 1_565 5_566 ? 
Br1 Hg2 Ag'' 105.20(14) 5_556 5_566 ? 
Br1 Hg2 Ag'' 74.80(14) 1_565 5_566 ? 
Br1 Hg2 Ag'' 120.7(2) . 5_566 ? 
I1 Hg2 Ag'' 59.3(2) 5_566 5_566 ? 
Br1 Hg2 Ag'' 59.3(2) 5_566 5_566 ? 
Hg1 Hg2 Ag'' 121.2(2) 5_566 5_566 ? 
Hg1 Hg2 Ag'' 58.8(2) . 5_566 ? 
Ag' Hg2 Ag'' 171.15(18) . 5_566 ? 
Ag' Hg2 Ag'' 8.85(17) 5_566 5_566 ? 
Ag' Hg2 Ag'' 73.86(13) 5_556 5_566 ? 
Ag' Hg2 Ag'' 106.14(14) 1_565 5_566 ? 
Ag'' Hg2 Ag'' 180.000(1) . 5_566 ? 
S Hg2 Ag'' 144.22(15) 6_556 5_556 ? 
S Hg2 Ag'' 35.78(15) 2_565 5_556 ? 
I1 Hg2 Ag'' 59.3(2) 5_556 5_556 ? 
I1 Hg2 Ag'' 120.7(2) 1_565 5_556 ? 
Br1 Hg2 Ag'' 59.3(2) 5_556 5_556 ? 
Br1 Hg2 Ag'' 120.7(2) 1_565 5_556 ? 
Br1 Hg2 Ag'' 74.80(14) . 5_556 ? 
I1 Hg2 Ag'' 105.20(14) 5_566 5_556 ? 
Br1 Hg2 Ag'' 105.20(14) 5_566 5_556 ? 
Hg1 Hg2 Ag'' 121.2(2) 5_566 5_556 ? 
Hg1 Hg2 Ag'' 58.8(2) . 5_556 ? 
Ag' Hg2 Ag'' 106.14(13) . 5_556 ? 
Ag' Hg2 Ag'' 73.86(13) 5_566 5_556 ? 
Ag' Hg2 Ag'' 8.85(17) 5_556 5_556 ? 
Ag' Hg2 Ag'' 171.15(18) 1_565 5_556 ? 
Ag'' Hg2 Ag'' 110.7(2) . 5_556 ? 
Ag'' Hg2 Ag'' 69.3(2) 5_566 5_556 ? 
S Hg2 Ag'' 35.78(15) 6_556 1_565 ? 
S Hg2 Ag'' 144.22(15) 2_565 1_565 ? 
I1 Hg2 Ag'' 120.7(2) 5_556 1_565 ? 
I1 Hg2 Ag'' 59.3(2) 1_565 1_565 ? 
Br1 Hg2 Ag'' 120.7(2) 5_556 1_565 ? 
Br1 Hg2 Ag'' 59.3(2) 1_565 1_565 ? 
Br1 Hg2 Ag'' 105.20(14) . 1_565 ? 
I1 Hg2 Ag'' 74.80(14) 5_566 1_565 ? 
Br1 Hg2 Ag'' 74.80(14) 5_566 1_565 ? 
Hg1 Hg2 Ag'' 58.8(2) 5_566 1_565 ? 
Hg1 Hg2 Ag'' 121.2(2) . 1_565 ? 
Ag' Hg2 Ag'' 73.86(13) . 1_565 ? 
Ag' Hg2 Ag'' 106.14(14) 5_566 1_565 ? 
Ag' Hg2 Ag'' 171.15(18) 5_556 1_565 ? 
Ag' Hg2 Ag'' 8.85(17) 1_565 1_565 ? 
Ag'' Hg2 Ag'' 69.3(2) . 1_565 ? 
Ag'' Hg2 Ag'' 110.7(2) 5_566 1_565 ? 
Ag'' Hg2 Ag'' 180.000(1) 5_556 1_565 ? 
Ag'' Ag' S 84.0(4) . 6_546 ? 
Ag'' Ag' S 84.0(4) . 6_556 ? 
S Ag' S 132.1(2) 6_546 6_556 ? 
Ag'' Ag' I2 74.8(10) . 1_554 ? 
S Ag' I2 110.57(12) 6_546 1_554 ? 
S Ag' I2 110.57(12) 6_556 1_554 ? 
Ag'' Ag' Br2 74.8(10) . 1_554 ? 
S Ag' Br2 110.57(12) 6_546 1_554 ? 
S Ag' Br2 110.57(12) 6_556 1_554 ? 
I2 Ag' Br2 0.00(3) 1_554 1_554 ? 
Ag'' Ag' Br1 174.5(10) . . ? 
S Ag' Br1 93.81(17) 6_546 . ? 
S Ag' Br1 93.81(17) 6_556 . ? 
I2 Ag' Br1 110.63(17) 1_554 . ? 
Br2 Ag' Br1 110.63(17) 1_554 . ? 
Ag'' Ag' Ag' 128.6(10) . 2 ? 
S Ag' Ag' 111.81(14) 6_546 2 ? 
S Ag' Ag' 111.81(14) 6_556 2 ? 
I2 Ag' Ag' 53.79(14) 1_554 2 ? 
Br2 Ag' Ag' 53.79(14) 1_554 2 ? 
Br1 Ag' Ag' 56.84(6) . 2 ? 
Ag'' Ag' Hg2 116.5(7) . . ? 
S Ag' Hg2 111.45(13) 6_546 . ? 
S Ag' Hg2 39.17(10) 6_556 . ? 
I2 Ag' Hg2 137.35(8) 1_554 . ? 
Br2 Ag' Hg2 137.35(8) 1_554 . ? 
Br1 Ag' Hg2 59.62(9) . . ? 
Ag' Ag' Hg2 102.82(9) 2 . ? 
Ag'' Ag' Hg2 116.5(7) . 1_545 ? 
S Ag' Hg2 39.17(10) 6_546 1_545 ? 
S Ag' Hg2 111.45(13) 6_556 1_545 ? 
I2 Ag' Hg2 137.35(8) 1_554 1_545 ? 
Br2 Ag' Hg2 137.35(8) 1_554 1_545 ? 
Br1 Ag' Hg2 59.62(9) . 1_545 ? 
Ag' Ag' Hg2 102.82(9) 2 1_545 ? 
Hg2 Ag' Hg2 77.25(9) . 1_545 ? 
Ag'' Ag' Ag'' 120.4(11) . 2 ? 
S Ag' Ag'' 113.02(12) 6_546 2 ? 
S Ag' Ag'' 113.02(12) 6_556 2 ? 
I2 Ag' Ag'' 45.5(3) 1_554 2 ? 
Br2 Ag' Ag'' 45.5(3) 1_554 2 ? 
Br1 Ag' Ag'' 65.10(14) . 2 ? 
Ag' Ag' Ag'' 8.26(15) 2 2 ? 
Hg2 Ag' Ag'' 109.10(10) . 2 ? 
Hg2 Ag' Ag'' 109.10(10) 1_545 2 ? 
Ag'' Ag' I2 19.3(10) . 5_556 ? 
S Ag' I2 76.84(16) 6_546 5_556 ? 
S Ag' I2 76.84(16) 6_556 5_556 ? 
I2 Ag' I2 94.08(17) 1_554 5_556 ? 
Br2 Ag' I2 94.08(17) 1_554 5_556 ? 
Br1 Ag' I2 155.29(9) . 5_556 ? 
Ag' Ag' I2 147.87(5) 2 5_556 ? 
Hg2 Ag' I2 102.15(9) . 5_556 ? 
Hg2 Ag' I2 102.15(9) 1_545 5_556 ? 
Ag'' Ag' I2 139.61(16) 2 5_556 ? 
Ag'' Ag' Br2 19.3(10) . 5_556 ? 
S Ag' Br2 76.84(16) 6_546 5_556 ? 
S Ag' Br2 76.84(16) 6_556 5_556 ? 
I2 Ag' Br2 94.08(17) 1_554 5_556 ? 
Br2 Ag' Br2 94.08(17) 1_554 5_556 ? 
Br1 Ag' Br2 155.29(9) . 5_556 ? 
Ag' Ag' Br2 147.87(5) 2 5_556 ? 
Hg2 Ag' Br2 102.15(9) . 5_556 ? 
Hg2 Ag' Br2 102.15(9) 1_545 5_556 ? 
Ag'' Ag' Br2 139.61(16) 2 5_556 ? 
I2 Ag' Br2 0.00(3) 5_556 5_556 ? 
Ag'' Ag' Ag'' 21.0(11) . 5 ? 
S Ag' Ag'' 92.5(2) 6_546 5 ? 
S Ag' Ag'' 92.5(2) 6_556 5 ? 
I2 Ag' Ag'' 53.83(16) 1_554 5 ? 
Br2 Ag' Ag'' 53.83(16) 1_554 5 ? 
Br1 Ag' Ag'' 164.46(18) . 5 ? 
Ag' Ag' Ag'' 107.62(17) 2 5 ? 
Hg2 Ag' Ag'' 130.30(17) . 5 ? 
Hg2 Ag' Ag'' 130.30(17) 1_545 5 ? 
Ag'' Ag' Ag'' 99.4(2) 2 5 ? 
I2 Ag' Ag'' 40.2(2) 5_556 5 ? 
Br2 Ag' Ag'' 40.2(2) 5_556 5 ? 
Ag'' Ag' Hg1 62.2(8) . 5_556 ? 
S Ag' Hg1 33.27(10) 6_546 5_556 ? 
S Ag' Hg1 102.11(15) 6_556 5_556 ? 
I2 Ag' Hg1 121.93(15) 1_554 5_556 ? 
Br2 Ag' Hg1 121.93(15) 1_554 5_556 ? 
Br1 Ag' Hg1 113.59(9) . 5_556 ? 
Ag' Ag' Hg1 144.90(5) 2 5_556 ? 
Hg2 Ag' Hg1 97.67(7) . 5_556 ? 
Hg2 Ag' Hg1 54.48(4) 1_545 5_556 ? 
Ag'' Ag' Hg1 144.86(5) 2 5_556 ? 
I2 Ag' Hg1 48.48(7) 5_556 5_556 ? 
Br2 Ag' Hg1 48.48(7) 5_556 5_556 ? 
Ag'' Ag' Hg1 78.8(2) 5 5_556 ? 
Ag'' Ag' Hg1 62.2(8) . 5_566 ? 
S Ag' Hg1 102.11(15) 6_546 5_566 ? 
S Ag' Hg1 33.27(10) 6_556 5_566 ? 
I2 Ag' Hg1 121.93(15) 1_554 5_566 ? 
Br2 Ag' Hg1 121.93(15) 1_554 5_566 ? 
Br1 Ag' Hg1 113.59(9) . 5_566 ? 
Ag' Ag' Hg1 144.90(5) 2 5_566 ? 
Hg2 Ag' Hg1 54.48(4) . 5_566 ? 
Hg2 Ag' Hg1 97.67(7) 1_545 5_566 ? 
Ag'' Ag' Hg1 144.86(5) 2 5_566 ? 
I2 Ag' Hg1 48.48(7) 5_556 5_566 ? 
Br2 Ag' Hg1 48.48(7) 5_556 5_566 ? 
Ag'' Ag' Hg1 78.8(2) 5 5_566 ? 
Hg1 Ag' Hg1 69.81(8) 5_556 5_566 ? 
Ag'' Ag' I1 93.7(10) . 5_556 ? 
S Ag' I1 67.37(9) 6_546 5_556 ? 
S Ag' I1 67.37(9) 6_556 5_556 ? 
I2 Ag' I1 168.5(2) 1_554 5_556 ? 
Br2 Ag' I1 168.5(2) 1_554 5_556 ? 
Br1 Ag' I1 80.89(9) . 5_556 ? 
Ag' Ag' I1 137.73(9) 2 5_556 ? 
Hg2 Ag' I1 48.09(4) . 5_556 ? 
Hg2 Ag' I1 48.09(4) 1_545 5_556 ? 
Ag'' Ag' I1 146.00(14) 2 5_556 ? 
I2 Ag' I1 74.39(8) 5_556 5_556 ? 
Br2 Ag' I1 74.39(8) 5_556 5_556 ? 
Ag'' Ag' I1 114.6(2) 5 5_556 ? 
Hg1 Ag' I1 49.95(4) 5_556 5_556 ? 
Hg1 Ag' I1 49.95(4) 5_566 5_556 ? 
Ag'' Ag' Br1 93.7(10) . 5_556 ? 
S Ag' Br1 67.37(9) 6_546 5_556 ? 
S Ag' Br1 67.37(9) 6_556 5_556 ? 
I2 Ag' Br1 168.5(2) 1_554 5_556 ? 
Br2 Ag' Br1 168.5(2) 1_554 5_556 ? 
Br1 Ag' Br1 80.89(9) . 5_556 ? 
Ag' Ag' Br1 137.73(9) 2 5_556 ? 
Hg2 Ag' Br1 48.09(4) . 5_556 ? 
Hg2 Ag' Br1 48.09(4) 1_545 5_556 ? 
Ag'' Ag' Br1 146.00(14) 2 5_556 ? 
I2 Ag' Br1 74.39(8) 5_556 5_556 ? 
Br2 Ag' Br1 74.39(8) 5_556 5_556 ? 
Ag'' Ag' Br1 114.6(2) 5 5_556 ? 
Hg1 Ag' Br1 49.95(4) 5_556 5_556 ? 
Hg1 Ag' Br1 49.95(4) 5_566 5_556 ? 
I1 Ag' Br1 0.0 5_556 5_556 ? 
Ag'' Ag' Ag' 90.000(2) . 1_565 ? 
S Ag' Ag' 156.06(10) 6_546 1_565 ? 
S Ag' Ag' 23.94(10) 6_556 1_565 ? 
I2 Ag' Ag' 90.0 1_554 1_565 ? 
Br2 Ag' Ag' 90.0 1_554 1_565 ? 
Br1 Ag' Ag' 90.0 . 1_565 ? 
Ag' Ag' Ag' 90.0 2 1_565 ? 
Hg2 Ag' Ag' 51.37(4) . 1_565 ? 
Hg2 Ag' Ag' 128.63(4) 1_545 1_565 ? 
Ag'' Ag' Ag' 90.0 2 1_565 ? 
I2 Ag' Ag' 90.0 5_556 1_565 ? 
Br2 Ag' Ag' 90.0 5_556 1_565 ? 
Ag'' Ag' Ag' 90.0 5 1_565 ? 
Hg1 Ag' Ag' 124.90(4) 5_556 1_565 ? 
Hg1 Ag' Ag' 55.10(4) 5_566 1_565 ? 
I1 Ag' Ag' 90.0 5_556 1_565 ? 
Br1 Ag' Ag' 90.0 5_556 1_565 ? 
Ag'' Ag' Ag' 90.000(2) . 1_545 ? 
S Ag' Ag' 23.94(10) 6_546 1_545 ? 
S Ag' Ag' 156.06(10) 6_556 1_545 ? 
I2 Ag' Ag' 90.0 1_554 1_545 ? 
Br2 Ag' Ag' 90.0 1_554 1_545 ? 
Br1 Ag' Ag' 90.0 . 1_545 ? 
Ag' Ag' Ag' 90.0 2 1_545 ? 
Hg2 Ag' Ag' 128.63(4) . 1_545 ? 
Hg2 Ag' Ag' 51.37(4) 1_545 1_545 ? 
Ag'' Ag' Ag' 90.0 2 1_545 ? 
I2 Ag' Ag' 90.0 5_556 1_545 ? 
Br2 Ag' Ag' 90.0 5_556 1_545 ? 
Ag'' Ag' Ag' 90.0 5 1_545 ? 
Hg1 Ag' Ag' 55.10(4) 5_556 1_545 ? 
Hg1 Ag' Ag' 124.90(4) 5_566 1_545 ? 
I1 Ag' Ag' 90.0 5_556 1_545 ? 
Br1 Ag' Ag' 90.0 5_556 1_545 ? 
Ag' Ag' Ag' 180.0 1_565 1_545 ? 
Ag' Ag'' S 80.2(5) . 6_556 ? 
Ag' Ag'' S 80.2(5) . 6_546 ? 
S Ag'' S 129.8(5) 6_556 6_546 ? 
Ag' Ag'' I2 90.8(11) . 1_554 ? 
S Ag'' I2 113.0(3) 6_556 1_554 ? 
S Ag'' I2 113.0(3) 6_546 1_554 ? 
Ag' Ag'' Br2 90.8(11) . 1_554 ? 
S Ag'' Br2 113.0(3) 6_556 1_554 ? 
S Ag'' Br2 113.0(3) 6_546 1_554 ? 
I2 Ag'' Br2 0.00(4) 1_554 1_554 ? 
Ag' Ag'' I2 156.7(11) . 5_556 ? 
S Ag'' I2 90.2(4) 6_556 5_556 ? 
S Ag'' I2 90.2(4) 6_546 5_556 ? 
I2 Ag'' I2 112.5(5) 1_554 5_556 ? 
Br2 Ag'' I2 112.5(5) 1_554 5_556 ? 
Ag' Ag'' Br2 156.7(11) . 5_556 ? 
S Ag'' Br2 90.2(4) 6_556 5_556 ? 
S Ag'' Br2 90.2(4) 6_546 5_556 ? 
I2 Ag'' Br2 112.5(5) 1_554 5_556 ? 
Br2 Ag'' Br2 112.5(5) 1_554 5_556 ? 
I2 Ag'' Br2 0.00(4) 5_556 5_556 ? 
Ag' Ag'' Ag'' 154.7(13) . 5 ? 
S Ag'' Ag'' 108.7(4) 6_556 5 ? 
S Ag'' Ag'' 108.7(4) 6_546 5 ? 
I2 Ag'' Ag'' 63.9(3) 1_554 5 ? 
Br2 Ag'' Ag'' 63.9(3) 1_554 5 ? 
I2 Ag'' Ag'' 48.6(4) 5_556 5 ? 
Br2 Ag'' Ag'' 48.6(4) 5_556 5 ? 
Ag' Ag'' Br1 4.4(8) . . ? 
S Ag'' Br1 78.5(4) 6_556 . ? 
S Ag'' Br1 78.5(4) 6_546 . ? 
I2 Ag'' Br1 95.2(4) 1_554 . ? 
Br2 Ag'' Br1 95.2(4) 1_554 . ? 
I2 Ag'' Br1 152.2(3) 5_556 . ? 
Br2 Ag'' Br1 152.2(3) 5_556 . ? 
Ag'' Ag'' Br1 159.1(6) 5 . ? 
Ag' Ag'' Hg1 108.4(8) . 5_556 ? 
S Ag'' Hg1 109.2(3) 6_556 5_556 ? 
S Ag'' Hg1 38.42(18) 6_546 5_556 ? 
I2 Ag'' Hg1 136.0(3) 1_554 5_556 ? 
Br2 Ag'' Hg1 136.0(3) 1_554 5_556 ? 
I2 Ag'' Hg1 54.9(2) 5_556 5_556 ? 
Br2 Ag'' Hg1 54.9(2) 5_556 5_556 ? 
Ag'' Ag'' Hg1 91.4(5) 5 5_556 ? 
Br1 Ag'' Hg1 105.0(3) . 5_556 ? 
Ag' Ag'' Hg1 108.4(8) . 5_566 ? 
S Ag'' Hg1 38.42(18) 6_556 5_566 ? 
S Ag'' Hg1 109.2(3) 6_546 5_566 ? 
I2 Ag'' Hg1 136.0(3) 1_554 5_566 ? 
Br2 Ag'' Hg1 136.0(3) 1_554 5_566 ? 
I2 Ag'' Hg1 54.9(2) 5_556 5_566 ? 
Br2 Ag'' Hg1 54.9(2) 5_556 5_566 ? 
Ag'' Ag'' Hg1 91.4(5) 5 5_566 ? 
Br1 Ag'' Hg1 105.0(3) . 5_566 ? 
Hg1 Ag'' Hg1 75.8(2) 5_556 5_566 ? 
Ag' Ag'' Ag' 43.1(9) . 2 ? 
S Ag'' Ag' 98.1(4) 6_556 2 ? 
S Ag'' Ag' 98.1(4) 6_546 2 ? 
I2 Ag'' Ag' 47.7(3) 1_554 2 ? 
Br2 Ag'' Ag' 47.7(3) 1_554 2 ? 
I2 Ag'' Ag' 160.2(3) 5_556 2 ? 
Br2 Ag'' Ag' 160.2(3) 5_556 2 ? 
Ag'' Ag'' Ag' 111.6(5) 5 2 ? 
Br1 Ag'' Ag' 47.56(16) . 2 ? 
Hg1 Ag'' Ag' 136.4(2) 5_556 2 ? 
Hg1 Ag'' Ag' 136.4(2) 5_566 2 ? 
Ag' Ag'' Ag' 159.0(11) . 5 ? 
S Ag'' Ag' 107.4(4) 6_556 5 ? 
S Ag'' Ag' 107.4(4) 6_546 5 ? 
I2 Ag'' Ag' 68.2(3) 1_554 5 ? 
Br2 Ag'' Ag' 68.2(3) 1_554 5 ? 
I2 Ag'' Ag' 44.3(2) 5_556 5 ? 
Br2 Ag'' Ag' 44.3(2) 5_556 5 ? 
Ag'' Ag'' Ag' 4.3(3) 5 5 ? 
Br1 Ag'' Ag' 163.4(3) . 5 ? 
Hg1 Ag'' Ag' 88.0(3) 5_556 5 ? 
Hg1 Ag'' Ag' 88.0(3) 5_566 5 ? 
Ag' Ag'' Ag' 115.9(2) 2 5 ? 
Ag' Ag'' Hg2 54.6(7) . . ? 
S Ag'' Hg2 32.8(2) 6_556 . ? 
S Ag'' Hg2 100.9(4) 6_546 . ? 
I2 Ag'' Hg2 126.3(4) 1_554 . ? 
Br2 Ag'' Hg2 126.3(4) 1_554 . ? 
I2 Ag'' Hg2 107.5(2) 5_556 . ? 
Br2 Ag'' Hg2 107.5(2) 5_556 . ? 
Ag'' Ag'' Hg2 140.6(3) 5 . ? 
Br1 Ag'' Hg2 51.49(19) . . ? 
Hg1 Ag'' Hg2 96.3(2) 5_556 . ? 
Hg1 Ag'' Hg2 53.88(11) 5_566 . ? 
Ag' Ag'' Hg2 88.6(3) 2 . ? 
Ag' Ag'' Hg2 138.6(3) 5 . ? 
Ag' Ag'' Hg2 54.6(7) . 1_545 ? 
S Ag'' Hg2 100.9(4) 6_556 1_545 ? 
S Ag'' Hg2 32.8(2) 6_546 1_545 ? 
I2 Ag'' Hg2 126.3(4) 1_554 1_545 ? 
Br2 Ag'' Hg2 126.3(4) 1_554 1_545 ? 
I2 Ag'' Hg2 107.5(2) 5_556 1_545 ? 
Br2 Ag'' Hg2 107.5(2) 5_556 1_545 ? 
Ag'' Ag'' Hg2 140.6(3) 5 1_545 ? 
Br1 Ag'' Hg2 51.49(19) . 1_545 ? 
Hg1 Ag'' Hg2 53.88(11) 5_556 1_545 ? 
Hg1 Ag'' Hg2 96.3(2) 5_566 1_545 ? 
Ag' Ag'' Hg2 88.6(3) 2 1_545 ? 
Ag' Ag'' Hg2 138.6(3) 5 1_545 ? 
Hg2 Ag'' Hg2 69.3(2) . 1_545 ? 
Ag' Ag'' Ag'' 51.4(10) . 2 ? 
S Ag'' Ag'' 101.4(3) 6_556 2 ? 
S Ag'' Ag'' 101.4(3) 6_546 2 ? 
I2 Ag'' Ag'' 39.4(4) 1_554 2 ? 
Br2 Ag'' Ag'' 39.4(4) 1_554 2 ? 
I2 Ag'' Ag'' 151.9(2) 5_556 2 ? 
Br2 Ag'' Ag'' 151.9(2) 5_556 2 ? 
Ag'' Ag'' Ag'' 103.3(4) 5 2 ? 
Br1 Ag'' Ag'' 55.82(16) . 2 ? 
Hg1 Ag'' Ag'' 139.65(18) 5_556 2 ? 
Hg1 Ag'' Ag'' 139.65(18) 5_566 2 ? 
Ag' Ag'' Ag'' 8.26(15) 2 2 ? 
Ag' Ag'' Ag'' 107.62(17) 5 2 ? 
Hg2 Ag'' Ag'' 95.4(2) . 2 ? 
Hg2 Ag'' Ag'' 95.4(2) 1_545 2 ? 
Ag' Ag'' I1 77.6(10) . 5_556 ? 
S Ag'' I1 65.4(2) 6_556 5_556 ? 
S Ag'' I1 65.4(2) 6_546 5_556 ? 
I2 Ag'' I1 168.3(6) 1_554 5_556 ? 
Br2 Ag'' I1 168.3(6) 1_554 5_556 ? 
I2 Ag'' I1 79.1(2) 5_556 5_556 ? 
Br2 Ag'' I1 79.1(2) 5_556 5_556 ? 
Ag'' Ag'' I1 127.7(6) 5 5_556 ? 
Br1 Ag'' I1 73.1(2) . 5_556 ? 
Hg1 Ag'' I1 50.29(12) 5_556 5_556 ? 
Hg1 Ag'' I1 50.29(12) 5_566 5_556 ? 
Ag' Ag'' I1 120.7(3) 2 5_556 ? 
Ag' Ag'' I1 123.4(4) 5 5_556 ? 
Hg2 Ag'' I1 45.97(11) . 5_556 ? 
Hg2 Ag'' I1 45.97(11) 1_545 5_556 ? 
Ag'' Ag'' I1 128.9(2) 2 5_556 ? 
Ag' Ag'' Br1 77.6(10) . 5_556 ? 
S Ag'' Br1 65.4(2) 6_556 5_556 ? 
S Ag'' Br1 65.4(2) 6_546 5_556 ? 
I2 Ag'' Br1 168.3(6) 1_554 5_556 ? 
Br2 Ag'' Br1 168.3(6) 1_554 5_556 ? 
I2 Ag'' Br1 79.1(2) 5_556 5_556 ? 
Br2 Ag'' Br1 79.1(2) 5_556 5_556 ? 
Ag'' Ag'' Br1 127.7(6) 5 5_556 ? 
Br1 Ag'' Br1 73.1(2) . 5_556 ? 
Hg1 Ag'' Br1 50.29(12) 5_556 5_556 ? 
Hg1 Ag'' Br1 50.29(12) 5_566 5_556 ? 
Ag' Ag'' Br1 120.7(3) 2 5_556 ? 
Ag' Ag'' Br1 123.4(4) 5 5_556 ? 
Hg2 Ag'' Br1 45.97(11) . 5_556 ? 
Hg2 Ag'' Br1 45.97(11) 1_545 5_556 ? 
Ag'' Ag'' Br1 128.9(2) 2 5_556 ? 
I1 Ag'' Br1 0.0 5_556 5_556 ? 
Ag' Ag'' Ag'' 90.000(1) . 1_565 ? 
S Ag'' Ag'' 25.1(2) 6_556 1_565 ? 
S Ag'' Ag'' 154.9(2) 6_546 1_565 ? 
I2 Ag'' Ag'' 90.0 1_554 1_565 ? 
Br2 Ag'' Ag'' 90.0 1_554 1_565 ? 
I2 Ag'' Ag'' 90.0 5_556 1_565 ? 
Br2 Ag'' Ag'' 90.0 5_556 1_565 ? 
Ag'' Ag'' Ag'' 90.000(1) 5 1_565 ? 
Br1 Ag'' Ag'' 90.0 . 1_565 ? 
Hg1 Ag'' Ag'' 127.88(12) 5_556 1_565 ? 
Hg1 Ag'' Ag'' 52.12(12) 5_566 1_565 ? 
Ag' Ag'' Ag'' 90.0 2 1_565 ? 
Ag' Ag'' Ag'' 90.0 5 1_565 ? 
Hg2 Ag'' Ag'' 55.33(11) . 1_565 ? 
Hg2 Ag'' Ag'' 124.67(11) 1_545 1_565 ? 
Ag'' Ag'' Ag'' 90.0 2 1_565 ? 
I1 Ag'' Ag'' 90.0 5_556 1_565 ? 
Br1 Ag'' Ag'' 90.0 5_556 1_565 ? 
Ag' Br1 Ag' 66.32(12) . 2 ? 
Ag' Br1 Hg2 117.14(5) . 2_565 ? 
Ag' Br1 Hg2 69.95(4) 2 2_565 ? 
Ag' Br1 Hg2 69.95(4) . 1_545 ? 
Ag' Br1 Hg2 117.13(5) 2 1_545 ? 
Hg2 Br1 Hg2 172.25(6) 2_565 1_545 ? 
Ag' Br1 Hg2 69.95(4) . . ? 
Ag' Br1 Hg2 117.13(5) 2 . ? 
Hg2 Br1 Hg2 93.83(3) 2_565 . ? 
Hg2 Br1 Hg2 85.64(3) 1_545 . ? 
Ag' Br1 Hg2 117.13(5) . 2 ? 
Ag' Br1 Hg2 69.95(4) 2 2 ? 
Hg2 Br1 Hg2 85.64(3) 2_565 2 ? 
Hg2 Br1 Hg2 93.83(3) 1_545 2 ? 
Hg2 Br1 Hg2 172.25(6) . 2 ? 
Ag' Br1 Hg1 130.04(4) . . ? 
Ag' Br1 Hg1 130.04(4) 2 . ? 
Hg2 Br1 Hg1 60.86(2) 2_565 . ? 
Hg2 Br1 Hg1 112.52(4) 1_545 . ? 
Hg2 Br1 Hg1 60.86(2) . . ? 
Hg2 Br1 Hg1 112.52(4) 2 . ? 
Ag' Br1 Hg1 130.04(4) . 1_545 ? 
Ag' Br1 Hg1 130.04(4) 2 1_545 ? 
Hg2 Br1 Hg1 112.52(4) 2_565 1_545 ? 
Hg2 Br1 Hg1 60.86(2) 1_545 1_545 ? 
Hg2 Br1 Hg1 112.52(4) . 1_545 ? 
Hg2 Br1 Hg1 60.86(2) 2 1_545 ? 
Hg1 Br1 Hg1 79.57(5) . 1_545 ? 
Ag' Br1 Ag'' 1.02(19) . . ? 
Ag' Br1 Ag'' 67.34(15) 2 . ? 
Hg2 Br1 Ag'' 117.79(11) 2_565 . ? 
Hg2 Br1 Ag'' 69.25(11) 1_545 . ? 
Hg2 Br1 Ag'' 69.25(11) . . ? 
Hg2 Br1 Ag'' 117.79(11) 2 . ? 
Hg1 Br1 Ag'' 129.47(9) . . ? 
Hg1 Br1 Ag'' 129.47(9) 1_545 . ? 
Ag' Br1 Ag'' 67.34(15) . 2 ? 
Ag' Br1 Ag'' 1.02(19) 2 2 ? 
Hg2 Br1 Ag'' 69.25(11) 2_565 2 ? 
Hg2 Br1 Ag'' 117.79(11) 1_545 2 ? 
Hg2 Br1 Ag'' 117.79(11) . 2 ? 
Hg2 Br1 Ag'' 69.25(11) 2 2 ? 
Hg1 Br1 Ag'' 129.47(9) . 2 ? 
Hg1 Br1 Ag'' 129.47(9) 1_545 2 ? 
Ag'' Br1 Ag'' 68.4(3) . 2 ? 
Ag' Br1 Ag' 165.43(12) . 6_656 ? 
Ag' Br1 Ag' 99.11(9) 2 6_656 ? 
Hg2 Br1 Ag' 54.13(5) 2_565 6_656 ? 
Hg2 Br1 Ag' 119.67(7) 1_545 6_656 ? 
Hg2 Br1 Ag' 119.67(7) . 6_656 ? 
Hg2 Br1 Ag' 54.13(5) 2 6_656 ? 
Hg1 Br1 Ag' 58.88(6) . 6_656 ? 
Hg1 Br1 Ag' 58.88(6) 1_545 6_656 ? 
Ag'' Br1 Ag' 166.44(18) . 6_656 ? 
Ag'' Br1 Ag' 98.09(19) 2 6_656 ? 
Ag' Br1 Ag' 99.11(9) . 5_556 ? 
Ag' Br1 Ag' 165.43(12) 2 5_556 ? 
Hg2 Br1 Ag' 119.67(7) 2_565 5_556 ? 
Hg2 Br1 Ag' 54.13(5) 1_545 5_556 ? 
Hg2 Br1 Ag' 54.13(5) . 5_556 ? 
Hg2 Br1 Ag' 119.67(7) 2 5_556 ? 
Hg1 Br1 Ag' 58.88(6) . 5_556 ? 
Hg1 Br1 Ag' 58.88(6) 1_545 5_556 ? 
Ag'' Br1 Ag' 98.09(19) . 5_556 ? 
Ag'' Br1 Ag' 166.44(18) 2 5_556 ? 
Ag' Br1 Ag' 95.47(18) 6_656 5_556 ? 
Ag'' Br2 Ag'' 101.2(8) 2_556 1_556 ? 
Ag'' Br2 Ag' 14.4(3) 2_556 2_556 ? 
Ag'' Br2 Ag' 86.8(5) 1_556 2_556 ? 
Ag'' Br2 Ag' 86.8(5) 2_556 1_556 ? 
Ag'' Br2 Ag' 14.4(3) 1_556 1_556 ? 
Ag' Br2 Ag' 72.4(3) 2_556 1_556 ? 
Ag'' Br2 Ag'' 168.7(3) 2_556 5_556 ? 
Ag'' Br2 Ag'' 67.5(5) 1_556 5_556 ? 
Ag' Br2 Ag'' 154.28(16) 2_556 5_556 ? 
Ag' Br2 Ag'' 81.9(3) 1_556 5_556 ? 
Ag'' Br2 Ag'' 67.5(5) 2_556 6_656 ? 
Ag'' Br2 Ag'' 168.7(3) 1_556 6_656 ? 
Ag' Br2 Ag'' 81.9(3) 2_556 6_656 ? 
Ag' Br2 Ag'' 154.28(16) 1_556 6_656 ? 
Ag'' Br2 Ag'' 123.9(4) 5_556 6_656 ? 
Ag'' Br2 Hg1 116.6(2) 2_556 1_545 ? 
Ag'' Br2 Hg1 116.6(2) 1_556 1_545 ? 
Ag' Br2 Hg1 124.72(7) 2_556 1_545 ? 
Ag' Br2 Hg1 124.72(7) 1_556 1_545 ? 
Ag'' Br2 Hg1 70.60(13) 5_556 1_545 ? 
Ag'' Br2 Hg1 70.60(13) 6_656 1_545 ? 
Ag'' Br2 Hg1 116.6(2) 2_556 . ? 
Ag'' Br2 Hg1 116.6(2) 1_556 . ? 
Ag' Br2 Hg1 124.72(7) 2_556 . ? 
Ag' Br2 Hg1 124.72(7) 1_556 . ? 
Ag'' Br2 Hg1 70.60(13) 5_556 . ? 
Ag'' Br2 Hg1 70.60(13) 6_656 . ? 
Hg1 Br2 Hg1 90.19(5) 1_545 . ? 
Ag'' Br2 Ag' 172.7(4) 2_556 5_556 ? 
Ag'' Br2 Ag' 71.5(4) 1_556 5_556 ? 
Ag' Br2 Ag' 158.34(13) 2_556 5_556 ? 
Ag' Br2 Ag' 85.92(17) 1_556 5_556 ? 
Ag'' Br2 Ag' 4.1(2) 5_556 5_556 ? 
Ag'' Br2 Ag' 119.8(2) 6_656 5_556 ? 
Hg1 Br2 Ag' 67.95(4) 1_545 5_556 ? 
Hg1 Br2 Ag' 67.95(4) . 5_556 ? 
Ag'' Br2 Ag' 71.5(4) 2_556 6_656 ? 
Ag'' Br2 Ag' 172.7(4) 1_556 6_656 ? 
Ag' Br2 Ag' 85.92(17) 2_556 6_656 ? 
Ag' Br2 Ag' 158.34(13) 1_556 6_656 ? 
Ag'' Br2 Ag' 119.8(2) 5_556 6_656 ? 
Ag'' Br2 Ag' 4.1(2) 6_656 6_656 ? 
Hg1 Br2 Ag' 67.95(4) 1_545 6_656 ? 
Hg1 Br2 Ag' 67.95(4) . 6_656 ? 
Ag' Br2 Ag' 115.74(10) 5_556 6_656 ? 
Ag'' Br2 Ag'' 59.57(10) 2_556 2_566 ? 
Ag'' Br2 Ag'' 95.6(4) 1_556 2_566 ? 
Ag' Br2 Ag'' 60.62(9) 2_556 2_566 ? 
Ag' Br2 Ag'' 88.4(2) 1_556 2_566 ? 
Ag'' Br2 Ag'' 119.78(12) 5_556 2_566 ? 
Ag'' Br2 Ag'' 78.8(2) 6_656 2_566 ? 
Hg1 Br2 Ag'' 146.90(19) 1_545 2_566 ? 
Hg1 Br2 Ag'' 67.43(13) . 2_566 ? 
Ag' Br2 Ag'' 120.16(10) 5_556 2_566 ? 
Ag' Br2 Ag'' 80.8(2) 6_656 2_566 ? 
Ag'' Br2 Ag'' 95.6(4) 2_556 1_546 ? 
Ag'' Br2 Ag'' 59.57(10) 1_556 1_546 ? 
Ag' Br2 Ag'' 88.4(2) 2_556 1_546 ? 
Ag' Br2 Ag'' 60.62(9) 1_556 1_546 ? 
Ag'' Br2 Ag'' 78.8(2) 5_556 1_546 ? 
Ag'' Br2 Ag'' 119.78(12) 6_656 1_546 ? 
Hg1 Br2 Ag'' 67.43(13) 1_545 1_546 ? 
Hg1 Br2 Ag'' 146.90(19) . 1_546 ? 
Ag' Br2 Ag'' 80.8(2) 5_556 1_546 ? 
Ag' Br2 Ag'' 120.16(10) 6_656 1_546 ? 
Ag'' Br2 Ag'' 142.5(3) 2_566 1_546 ? 
Hg2 S Hg1 97.34(13) 2_565 . ? 
Hg2 S Ag' 98.32(16) 2_565 6_666 ? 
Hg1 S Ag' 110.95(14) . 6_666 ? 
Hg2 S Ag' 98.32(16) 2_565 6_656 ? 
Hg1 S Ag' 110.95(15) . 6_656 ? 
Ag' S Ag' 132.1(2) 6_666 6_656 ? 
Hg2 S Ag'' 111.4(3) 2_565 6_666 ? 
Hg1 S Ag'' 99.6(4) . 6_666 ? 
Ag' S Ag'' 15.8(3) 6_666 6_666 ? 
Ag' S Ag'' 133.9(2) 6_656 6_666 ? 
Hg2 S Ag'' 111.4(3) 2_565 6_656 ? 
Hg1 S Ag'' 99.6(4) . 6_656 ? 
Ag' S Ag'' 133.9(2) 6_666 6_656 ? 
Ag' S Ag'' 15.8(3) 6_656 6_656 ? 
Ag'' S Ag'' 129.8(5) 6_666 6_656 ? 
Hg2 S Ag'' 151.29(9) 2_565 2_566 ? 
Hg1 S Ag'' 82.90(19) . 2_566 ? 
Ag' S Ag'' 55.8(3) 6_666 2_566 ? 
Ag' S Ag'' 108.45(16) 6_656 2_566 ? 
Ag'' S Ag'' 41.2(5) 6_666 2_566 ? 
Ag'' S Ag'' 96.7(3) 6_656 2_566 ? 
Hg2 S Ag'' 151.29(9) 2_565 2_556 ? 
Hg1 S Ag'' 82.90(19) . 2_556 ? 
Ag' S Ag'' 108.45(16) 6_666 2_556 ? 
Ag' S Ag'' 55.8(3) 6_656 2_556 ? 
Ag'' S Ag'' 96.7(3) 6_666 2_556 ? 
Ag'' S Ag'' 41.2(5) 6_656 2_556 ? 
Ag'' S Ag'' 57.41(18) 2_566 2_556 ? 
Hg2 S Ag' 92.35(11) 2_565 5_666 ? 
Hg1 S Ag' 150.07(5) . 5_666 ? 
Ag' S Ag' 39.35(14) 6_666 5_666 ? 
Ag' S Ag' 95.44(12) 6_656 5_666 ? 
Ag'' S Ag' 50.6(4) 6_666 5_666 ? 
Ag'' S Ag' 103.0(3) 6_656 5_666 ? 
Ag'' S Ag' 75.3(2) 2_566 5_666 ? 
Ag'' S Ag' 101.68(18) 2_556 5_666 ? 
Hg2 S Ag' 92.35(11) 2_565 5_656 ? 
Hg1 S Ag' 150.07(5) . 5_656 ? 
Ag' S Ag' 95.44(12) 6_666 5_656 ? 
Ag' S Ag' 39.35(14) 6_656 5_656 ? 
Ag'' S Ag' 103.0(3) 6_666 5_656 ? 
Ag'' S Ag' 50.6(4) 6_656 5_656 ? 
Ag'' S Ag' 101.68(18) 2_566 5_656 ? 
Ag'' S Ag' 75.3(2) 2_556 5_656 ? 
Ag' S Ag' 56.70(8) 5_666 5_656 ? 
Hg2 S Hg2 62.92(4) 2_565 2 ? 
Hg1 S Hg2 93.33(6) . 2 ? 
Ag' S Hg2 151.59(19) 6_666 2 ? 
Ag' S Hg2 41.59(9) 6_656 2 ? 
Ag'' S Hg2 166.6(4) 6_666 2 ? 
Ag'' S Hg2 50.2(3) 6_656 2 ? 
Ag'' S Hg2 145.78(10) 2_566 2 ? 
Ag'' S Hg2 88.37(9) 2_556 2 ? 
Ag' S Hg2 116.20(7) 5_666 2 ? 
Ag' S Hg2 66.16(6) 5_656 2 ? 
Hg2 S Hg2 62.92(4) 2_565 2_575 ? 
Hg1 S Hg2 93.33(6) . 2_575 ? 
Ag' S Hg2 41.59(9) 6_666 2_575 ? 
Ag' S Hg2 151.59(19) 6_656 2_575 ? 
Ag'' S Hg2 50.2(3) 6_666 2_575 ? 
Ag'' S Hg2 166.6(4) 6_656 2_575 ? 
Ag'' S Hg2 88.37(9) 2_566 2_575 ? 
Ag'' S Hg2 145.78(10) 2_556 2_575 ? 
Ag' S Hg2 66.16(6) 5_666 2_575 ? 
Ag' S Hg2 116.20(7) 5_656 2_575 ? 
Hg2 S Hg2 125.84(7) 2 2_575 ? 
 
_diffrn_measured_fraction_theta_max    0.994 
_diffrn_reflns_theta_full              26.00 
_diffrn_measured_fraction_theta_full   0.993 
_refine_diff_density_max    2.154 
_refine_diff_density_min   -2.611 
_refine_diff_density_rms    0.406 
